# Supplementary material for: Syncing sustainable urban mobility with public transit policy trends based on global data analysis
Source: PubMed Central journal article supplement (PMC8292461; doi:10.1038/s41598-021-93741-4), 2021-07-20
Supplement: 41598_2021_93741_MOESM1_ESM.pdf [file 41598_2021_93741_MOESM1_ESM.pdf]

# Scientific Reports

## Supplementary Information for

### Syncing sustainable urban mobility with public transit policy trends based on global data analysis

**Avishai (Avi) Ceder**, Civil and Environmental Engineering, Technion-Israel Institute of Technology, Haifa, Israel; also, at Faculty of Engineering, University of Auckland, New Zealand; Beijing Jiaotong University, Beijing, China; and IDEC Hiroshima University, Japan. Email: [ceder@technion.ac.il](mailto:ceder@technion.ac.il) , Tel: +972-50-5216084.

#### **This part includes:**

- Supplementary Fig. 1. A conceptual flowchart for attaining contour maps.
- Supplementary Fig. 2. A conceptual flowchart for creating a future mobility scenario.
- Supplementary Table 1. Data and results of road traffic damages.
- Supplementary Table 2. Characteristics and data, part 1, of areas presented by Figs. 2 and 3.
- Supplementary Table 3. Characteristics and data, part 2, of areas presented by Figs. 2 and 3.
- Supplementary Table 4. Results of contour areas for four travel times used in Figs. 2 and 3.
- Supplementary Table 5. Characteristics of A, A1, and B of the 17-city.
- Supplementary Table 6. Number of automated vehicles out of 1000 PCs for three cases represented in Fig. 5.
- Supplementary Table 7. Number of automated vehicles out of 1000 PCs for two additional cases.
- Supplementary Table 8. Information for Supplementary Table 1 with a list of references/sources indicated by superscripts.
- Supplementary Table 9. Information on data sources and input data for ArcGIS 10.3.1.

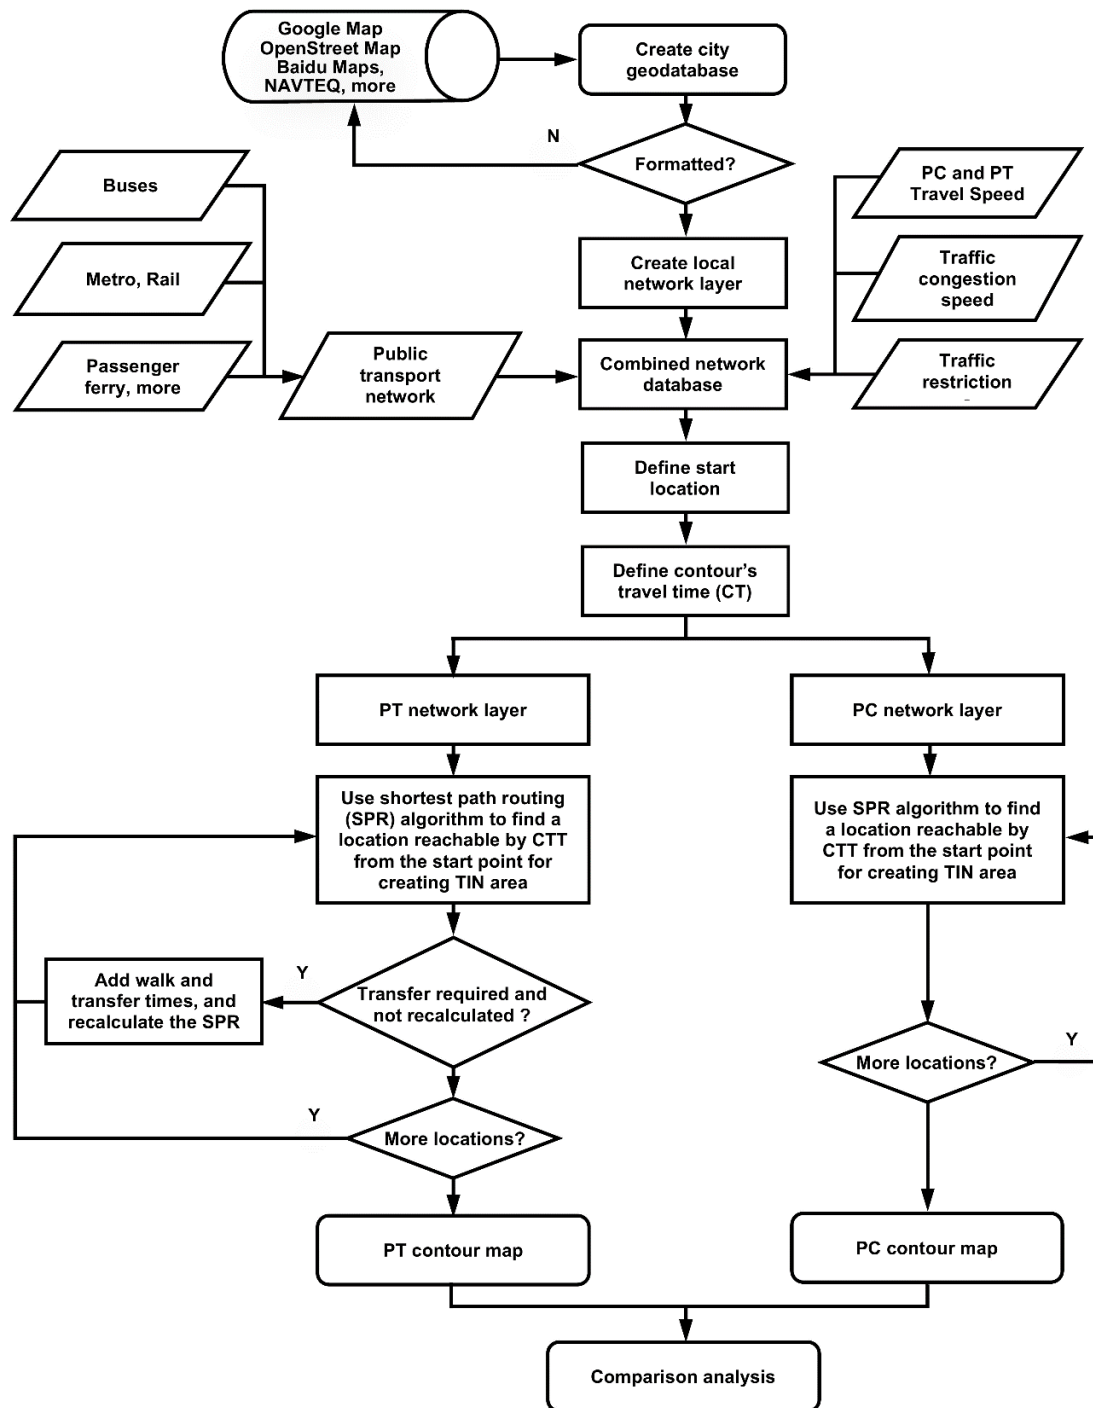

31  
 32 **Supplementary Fig. 1. A conceptual flowchart for attaining contour maps.** The process  
 33 occurring using ArcGIS 10.3.1 to create the PC and PT transport network layers followed by the  
 34 SPR algorithm to all locations feasible to reach within, or at the maximum, travel time chosen of  
 35 30, 45, 60 or 90 minutes. This generates the PC, PT and the overlapped TIN area for each, for all  
 36 of the 17 cities shown in Figs. 2 and 3 using actual input data.

37

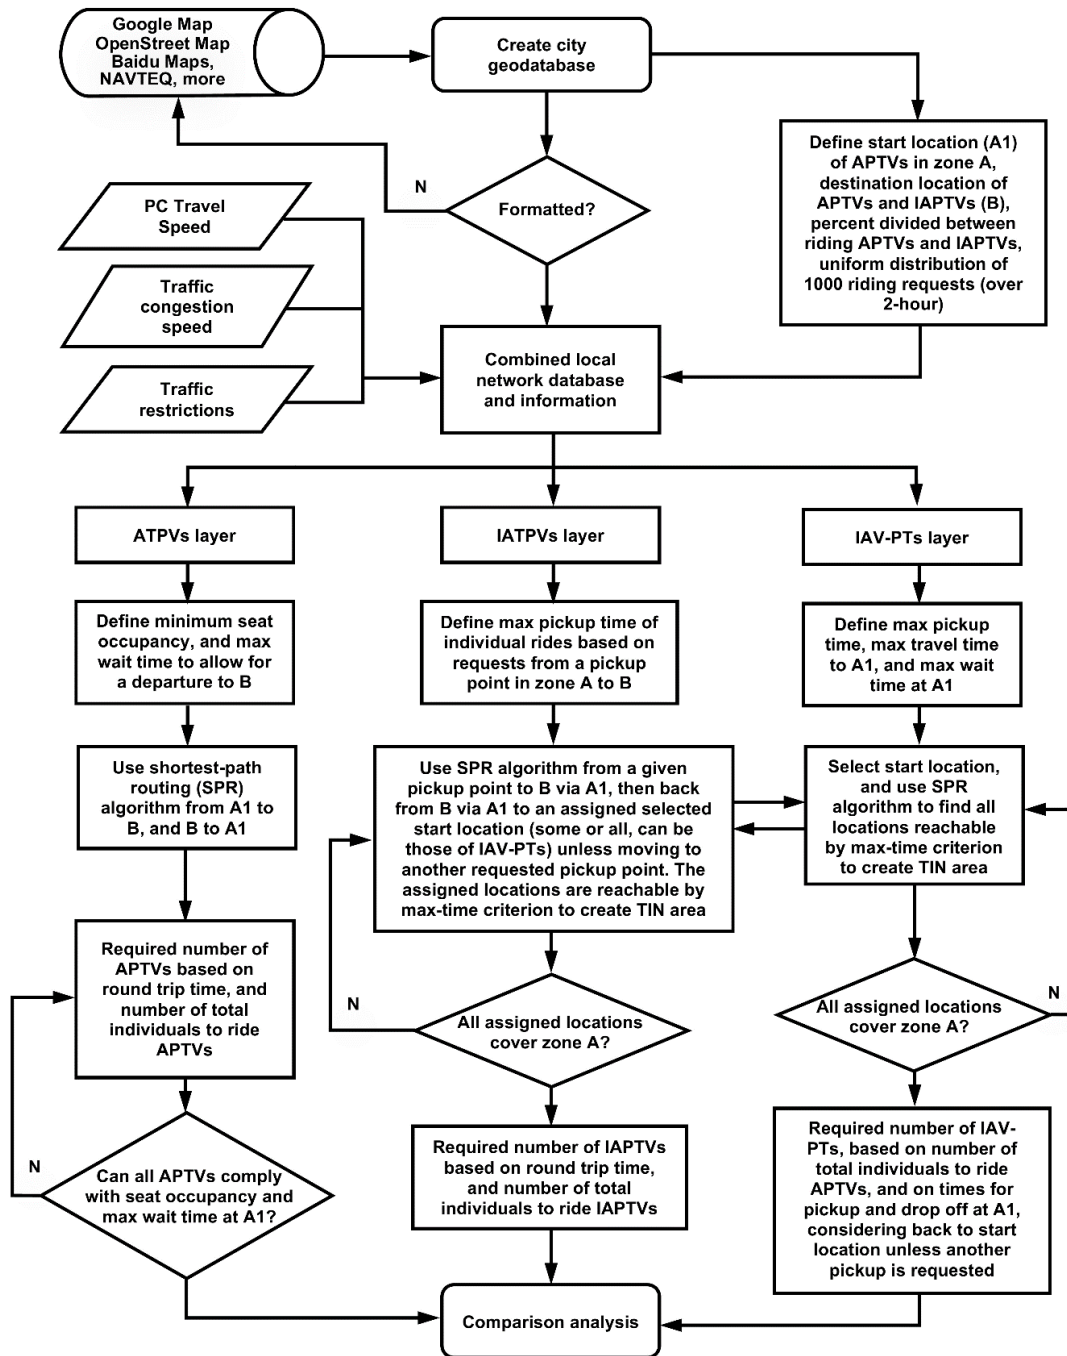

38

39 **Supplementary Fig. 2. A conceptual flowchart for creating a future mobility scenario.** The  
 40 construction of the ATPVs, IAPTVs, and IAV-PTs transport network layers and the general  
 41 procedures for pickup, drop off, and traversing SPR based sections of 1000 individual travel  
 42 requests. It shows the criteria of the analysis and the use of ArcGIS 10.3.1 for creating firstly, a  
 43 small TIN area around the starting points of IAPTVs, and IAV-PTs, and secondly, the TIN area of  
 44 the entire A zone. Actual data input were used to determine the number of automated vehicles  
 45 required, as shown in Fig. 5.

46  
47**Supplementary Table 1. Data and results of road traffic damages**

| Group   | Country      | D <sub>pc</sub><br>(km) | V <sub>pc</sub><br>(km/<br>hr) | LT <sub>pc</sub><br>(hr/<br>year) | %LT   | %F    | %PM<br>2.5 | %P   | Pop<br>(M) | # PCs<br>(M) | ALoM |
|---------|--------------|-------------------------|--------------------------------|-----------------------------------|-------|-------|------------|------|------------|--------------|------|
| Asia    | China        | 15,000                  | 26                             | 80                                | 33.68 | 61.49 | 17         | 93.5 | 1,409.5    | 217.0        | 10   |
|         | Japan        | 18,000                  | 24                             | 78                                | 48.00 | 13.99 | 23         | 91.3 | 127.5      | 78.1         | 54   |
|         | Singapore    | 16,700                  | 29                             | 87                                | 23.73 | 33.77 | 36         | 93.5 | 5.7        | 1.0          | 12   |
|         | India        | 20,000                  | 35                             | 60                                | 15.82 | 42.82 | 37         | 93.5 | 1,339.2    | 191.0        | 9    |
|         | Korea        | 13,651                  | 32                             | 107                               | 34.70 | 57.81 | 23         | 95.2 | 51.0       | 22.8         | 22   |
| Oceania | Australia    | 15,530                  | 32                             | 94                                | 28.20 | 32.33 | 26         | 94.5 | 24.5       | 19.2         | 44   |
|         | New Zealand  | 10,400                  | 24                             | 80                                | 32.54 | 28.57 | 26         | 95.0 | 4.7        | 3.8          | 50   |
| Africa  | South Africa | 20,000                  | 35                             | 90                                | 25.71 | 38.84 | 17         | 93.5 | 56.7       | 12.0         | 14   |
|         | Egypt        | 14,000                  | 35                             | 76                                | 21.71 | 54.35 | 17         | 95.5 | 97.6       | 9.4          | 4    |
| America | USA          | 18,000                  | 47                             | 42                                | 12.76 | 38.30 | 24         | 95.6 | 324.5      | 268.8        | 36   |
|         | Brazil       | 12,000                  | 29                             | 36                                | 11.22 | 35.76 | 34         | 95.3 | 209.3      | 4.3          | 1    |
|         | Mexico       | 13,000                  | 29                             | 58                                | 21.42 | 34.34 | 30         | 95.0 | 129.2      | 43.0         | 17   |
|         | Canada       | 13,000                  | 32                             | 74                                | 25.74 | 25.11 | 15         | 95.4 | 36.6       | 34.3         | 43   |
| Europe  | UK           | 14,550                  | 28                             | 30                                | 9.86  | 21.13 | 25         | 94.1 | 66.2       | 37.5         | 33   |
|         | France       | 15,294                  | 29                             | 70                                | 26.25 | 29.53 | 25         | 94.1 | 65.0       | 30.5         | 28   |
|         | Germany      | 14,835                  | 29                             | 35                                | 14.00 | 19.97 | 19         | 94.2 | 82.1       | 63.7         | 45   |
|         | Italy        | 14,000                  | 29                             | 19                                | 8.29  | 43.53 | 19         | 94.6 | 59.4       | 36.8         | 34   |
|         | Spain        | 4,148                   | 29                             | 18                                | 8.47  | 31.94 | 35         | 98.4 | 46.4       | 22.1         | 8    |
|         | Poland       | 6,672                   | 29                             | 60                                | 25.26 | 33.28 | 17         | 97.4 | 38.2       | 17.2         | 12   |

48

49 **Notations:** PCs = private cars; Pop = population; M = millions;50 D<sub>pc</sub> = average annual driving distance per PC;51 LT<sub>pc</sub> = average annual time lost in traffic congestion per PC;52 V<sub>pc</sub> = estimated average road traffic speed of PCs;

53 %LT = percent of lost time in traffic congestion out of total commuting time;

54 %F = percentage of road accident fatalities out of all deaths by accidents;

55 %PM<sub>2.5</sub> = percent of PM<sub>2.5</sub> from road traffic out of total produced;

56 %P = percentage of time cars park;

57 ALoM = nonstop (24/7) active PCs per 1000 inhabitants.

58 **Note:** Complete coverage of the data elements including sources appear in Supplementary Table

59 8.

60

61

62  
63  
64**Supplementary Table 2. Characteristics and data, part 1, of areas presented by Figs. 2 and 3**

| <b>City</b><br>(by pop. density) | <b>Total city pop.</b><br>(people) | <b>Country</b> | <b>Examined zone</b> | <b>Zone's pop. density</b><br>(people/km <sup>2</sup> ) | <b>Selected zone's center location as starting point</b> |
|----------------------------------|------------------------------------|----------------|----------------------|---------------------------------------------------------|----------------------------------------------------------|
| Mumbai                           | 12,442,373                         | India          | Santa Cruz West      | 27,223                                                  | Santa Cruz                                               |
| Paris                            | 2,240,000                          | France         | Le Marais            | 21,000                                                  | Le Centre Pompidou                                       |
| Seoul                            | 9,774,000                          | S. Korea       | City centre          | 17,000                                                  | Dongdaemum                                               |
| Tokyo                            | 9,273,000                          | Japan          | Bunkyo               | 14,790                                                  | Tokyo Train Station                                      |
| Mexico City                      | 8,875,000                          | Mexico         | Doctores             | 14,616                                                  | General Hospital                                         |
| New York                         | 8,538,000                          | USA            | Lower Manhattan      | 10,858                                                  | W41st St. & 6th Ave.                                     |
| Santiago                         | 5,561,000                          | Chile          | City center          | 9,339                                                   | Mall Plaza Alameda                                       |
| Singapore                        | 5,607,000                          | Singapore      | City center          | 9,302                                                   | Nex Mall                                                 |
| Bangkok                          | 5,782,000                          | Thailand       | City center          | 7,561                                                   | State Tower                                              |
| London                           | 8,853,000                          | United Kingdom | City center          | 5,632                                                   | Queen Theatre                                            |
| Chicago                          | 2,695,598                          | American       | CBD area             | 4,594                                                   | Randolph/Wabash                                          |
| Toronto                          | 2,731,571                          | Canada         | Old Toronto          | 4,334                                                   | CF Toronto Eaton Centre                                  |
| Shanghai                         | 24,183,300                         | China          | Jingan               | 6,000                                                   | Shanghai People's Square                                 |
| Auckland                         | 1,534,700                          | New Zealand    | Auckland CBD         | 1,400                                                   | Britomart                                                |
| Copenhagen                       | 1,295,686                          | Denmark        | Indre By             | 1,360                                                   | Norreport Station                                        |
| Beijing                          | 20,794,000                         | China          | Guomao               | 1,293                                                   | Beijing Yintai Centre                                    |
| Sydney                           | 5,029,768                          | Australia      | CBD area             | 400                                                     | Westfield Sydney                                         |

65  
66  
67**Supplementary Table 3. Characteristics and data, part 2, of areas presented by Figs. 2 and 3**

| <b>City</b><br>(by pop. density) | <b>Characteristics of the selected center</b>                        | <b>Land use characteristics</b>              | <b>Ave. vehicle speed</b><br>(km/hr)<br><b>5-6PM</b> | <b>Year of data</b> |
|----------------------------------|----------------------------------------------------------------------|----------------------------------------------|------------------------------------------------------|---------------------|
| Mumbai                           | Train station center with an airport nearby; high PT demand          | Train station, airports, shopping mall       | 19                                                   | 2015                |
| Paris                            | A busy center of traffic and the metro system                        | Shopping mall, tourism                       | 22                                                   | 2012                |
| Seoul                            | Subway transit center with heavy traffic conditions                  | University and shopping center               | 19                                                   | 2016                |
| Tokyo                            | Center with a high PT demand                                         | University, library, shopping mall offices   | 22                                                   | 2016                |
| Mexico City                      | A point with high PT and traffic demand                              | Commercial center, shopping mall, hospital   | 17                                                   | 2013                |
| New York                         | A busy central traffic area                                          | University, library, shopping mall offices   | 20                                                   | 2017                |
| Santiago                         | A busy central area with a high demand for subway and bus services   | Shopping mall, offices, government buildings | 37                                                   | 2014                |
| Singapore                        | Central, high demand, point of subway and bus lines                  | Shopping mall, schools, tourism              | 24                                                   | 2016                |
| Bangkok                          | High PT demand point with a subway station nearby                    | Tourism, shopping mall, offices              | 24                                                   | 2015                |
| London                           | Central busy traffic and subway point                                | Theater, shopping mall, tourism              | 24                                                   | 2017                |
| Chicago                          | Center and major PT demand point                                     | Parks, shopping malls, offices               | 34                                                   | 2017                |
| Toronto                          | High PT demand point with many rail stops nearby                     | University, library, shopping mall, tourism  | 35                                                   | 2016                |
| Shanghai                         | Central point of high PT and traffic demand with huge shopping malls | Shopping mall, offices                       | 16                                                   | 2017                |
| Auckland                         | A busy rail and bus activities and demand point                      | Shopping mall, offices                       | 27                                                   | 2017                |
| Copenhagen                       | Center and major PT station                                          | Parks, shopping malls, offices               | 24                                                   | 2012                |
| Beijing                          | A busy traffic, subway and bus demands' point                        | Conference hall, shopping mall, offices      | 16                                                   | 2017                |
| Sydney                           | Central demand point of trains and buses                             | Shopping mall, offices                       | 29                                                   | 2017                |

68  
69

70 **Supplementary Table 4. Results of contour areas for four travel times used in**  
 71 **Figs. 2 and 3**  
 72

| City no. | City (by pop. density) | Total contour area (km <sup>2</sup> ) for four T (minutes) |     |     |     | TBEC contour area (km <sup>2</sup> ) for four T (minutes) |     |     |     | TBC contour area (km <sup>2</sup> ) for four T (minutes) |     |     |    | CBT contour area (km <sup>2</sup> ) for four T (minutes) |    |     |     |
|----------|------------------------|------------------------------------------------------------|-----|-----|-----|-----------------------------------------------------------|-----|-----|-----|----------------------------------------------------------|-----|-----|----|----------------------------------------------------------|----|-----|-----|
|          |                        | 30                                                         | 45  | 60  | 90  | 30                                                        | 45  | 60  | 90  | 30                                                       | 45  | 60  | 90 | 30                                                       | 45 | 60  | 90  |
| 1        | Mumbai                 | 53                                                         | 62  | 64  | 103 | 42                                                        | 40  | 48  | 62  | 27                                                       | 20  | 15  | 7  | 11                                                       | 22 | 16  | 41  |
| 2        | Paris                  | 36                                                         | 103 | 189 | 251 | 30                                                        | 86  | 162 | 207 | 7                                                        | 31  | 77  | 71 | 6                                                        | 17 | 27  | 44  |
| 3        | Seoul                  | 69                                                         | 93  | 146 | 195 | 56                                                        | 67  | 103 | 109 | 33                                                       | 30  | 43  | 32 | 13                                                       | 26 | 43  | 86  |
| 4        | Tokyo                  | 134                                                        | 129 | 219 | 315 | 129                                                       | 120 | 143 | 258 | 90                                                       | 16  | 52  | 80 | 5                                                        | 9  | 76  | 57  |
| 5        | Mexico City            | 46                                                         | 171 | 170 | 279 | 37                                                        | 113 | 121 | 238 | 21                                                       | 85  | 63  | 79 | 9                                                        | 58 | 49  | 41  |
| 6        | Shanghai               | 163                                                        | 299 | 405 | 474 | 30                                                        | 226 | 306 | 343 | 7                                                        | 87  | 118 | 71 | 133                                                      | 73 | 99  | 131 |
| 7        | Beijing                | 26                                                         | 56  | 109 | 153 | 20                                                        | 54  | 88  | 110 | 8                                                        | 23  | 31  | 14 | 6                                                        | 2  | 21  | 43  |
| 8        | New York               | 36                                                         | 90  | 376 | 201 | 36                                                        | 90  | 354 | 139 | 24                                                       | 66  | 285 | 66 | 0                                                        | 0  | 22  | 62  |
| 9        | Santiago               | 61                                                         | 126 | 129 | 205 | 44                                                        | 75  | 74  | 134 | 18                                                       | 45  | 14  | 14 | 17                                                       | 51 | 55  | 71  |
| 10       | Singapore              | 86                                                         | 288 | 335 | 396 | 61                                                        | 260 | 231 | 229 | 17                                                       | 77  | 65  | 43 | 25                                                       | 28 | 104 | 167 |
| 11       | Bangkok                | 37                                                         | 85  | 164 | 157 | 29                                                        | 67  | 112 | 79  | 7                                                        | 12  | 43  | 1  | 8                                                        | 18 | 52  | 78  |
| 12       | London                 | 66                                                         | 311 | 364 | 189 | 66                                                        | 307 | 357 | 152 | 45                                                       | 263 | 297 | 82 | 0                                                        | 4  | 7   | 37  |
| 13       | Chicago                | 127                                                        | 73  | 103 | 131 | 124                                                       | 45  | 57  | 63  | 103                                                      | 8   | 7   | 6  | 3                                                        | 28 | 46  | 68  |
| 14       | Toronto                | 79                                                         | 128 | 171 | 207 | 51                                                        | 82  | 121 | 104 | 23                                                       | 29  | 40  | 11 | 28                                                       | 46 | 50  | 103 |
| 15       | Sydney                 | 52                                                         | 158 | 285 | 300 | 32                                                        | 88  | 137 | 117 | 9                                                        | 23  | 24  | 9  | 20                                                       | 70 | 148 | 183 |
| 16       | Auckland               | 72                                                         | 121 | 502 | 268 | 66                                                        | 85  | 293 | 224 | 44                                                       | 13  | 211 | 13 | 6                                                        | 36 | 209 | 44  |
| 17       | Copenhagen             | 121                                                        | 143 | 190 | 306 | 107                                                       | 81  | 99  | 142 | 70                                                       | 13  | 11  | 0  | 14                                                       | 62 | 91  | 164 |

73

74

75 **Notations:** T=30, 45, 60, 90 minutes representing maximum travel time to the contour line of  
 76 one of the four contour maps, where travel time is based on the shortest path routing  
 77 from the city's center point.

78 CBT - cars are better (faster) than transit.

79 TBC - transit is better (faster) than cars.

80 TBEC - transit is better (faster) or equal to cars.

81

82

83

84  
85  
86  
87  
88  
89**Supplementary Table 5. Characteristics of A, A1, and B of the 17-city**

| <b>City</b><br>(by pop.<br>density) | <b>Name of A</b>         | <b>Name/<br/>location<br/>of A1</b> | <b>Name/<br/>location<br/>of B</b> | <b>A1 to B<br/>distance<br/>(km)</b> |
|-------------------------------------|--------------------------|-------------------------------------|------------------------------------|--------------------------------------|
| Mumbai                              | Andheri East             | MIDC Police Station                 | Santa Cruz                         | 7.6                                  |
| Paris                               | Boulogne-<br>Billancourt | Mairie                              | Le Centre<br>Pompidou              | 10.1                                 |
| Seoul                               | Seocho-gu                | Nambu Bus<br>Terminal               | Dongdaemum<br>Market               | 11.2                                 |
| Tokyo                               | Edogawa City             | Matsue Park                         | Tokyo Train<br>Station             | 12.3                                 |
| Mexico City                         | Naucalpan                | Acueducto de los<br>Remedios        | General Hospital                   | 14.6                                 |
| Shanghai                            | Putuo                    | Back Qinjia Corner                  | Shanghai People's<br>Square        | 13.4                                 |
| Beijing                             | Wangjing                 | Futong Train Station                | Beijing Yintai<br>Centre           | 12.0                                 |
| New York                            | Maspeth                  | St. Stanislaus<br>Kostka School     | Midtown Soho                       | 9.0                                  |
| Santiago                            | Las Condes               | Pueblito Los<br>Dominicos           | Mall Plaza<br>Alameda              | 18.5                                 |
| Singapore                           | Sengkang                 | Springdale Primary<br>School        | Nex Mall                           | 8.0                                  |
| Bangkok                             | Wang Thonglang           | Udomsuksa School                    | State Tower                        | 17.0                                 |
| London                              | Camberwell               | Camberwell Library                  | Queen Theatre                      | 7.8                                  |
| Chicago                             | Humboldt Park            | Harding (Frederick)<br>Park         | Randolph/Wabash                    | 12.0                                 |
| Toronto                             | York                     | Eglinton - Gilbert<br>Parkette      | CF Toronto Eaton<br>Centre         | 10.5                                 |
| Sydney                              | Marrickville             | Marrickville Town<br>Hall           | Westfield Sydney                   | 9.5                                  |
| Auckland                            | Mount Roskill            | Dominion Road<br>School             | Britomart                          | 11.0                                 |
| Copenhagen                          | Vanløse                  | Børglumvej<br>(Jernbane Allé)       | Norreport Station                  | 8.2                                  |



90 **Supplementary Table 6. Number of automated vehicles out of 1000 PCs for three cases**  
 91 **represented in Fig. 5**  
 92

| City<br>(by pop.<br>density) | [%APTV, %IAPTV]   |                    |                    |                                            |                           |          |          |          |          |          |          |          |          |          |          |
|------------------------------|-------------------|--------------------|--------------------|--------------------------------------------|---------------------------|----------|----------|----------|----------|----------|----------|----------|----------|----------|----------|
|                              | [100,0]           |                    |                    |                                            |                           | [50,50]  |          |          |          |          | [0,100]  |          |          |          |          |
|                              | APTVs<br><i>a</i> | IAPTVs<br><i>b</i> | IAPTVs<br><i>c</i> | Total<br><i>d</i> =<br><i>a</i> + <i>c</i> | Total<br>in %<br><i>e</i> | <i>a</i> | <i>b</i> | <i>c</i> | <i>d</i> | <i>e</i> | <i>a</i> | <i>b</i> | <i>c</i> | <i>d</i> | <i>e</i> |
| Mumbai                       | 32                | 62                 | 0                  | 32                                         | 3%                        | 17       | 52       | 350      | 367      | 37%      | 0        | 0        | 700      | 700      | 70%      |
| Paris                        | 31                | 91                 | 0                  | 31                                         | 3%                        | 16       | 45       | 317      | 333      | 33%      | 0        | 0        | 633      | 633      | 63%      |
| Seoul                        | 28                | 45                 | 0                  | 28                                         | 3%                        | 19       | 35       | 263      | 282      | 28%      | 0        | 0        | 525      | 525      | 53%      |
| Tokyo                        | 29                | 62                 | 0                  | 29                                         | 3%                        | 15       | 36       | 267      | 282      | 28%      | 0        | 0        | 533      | 533      | 53%      |
| Mexico City                  | 33                | 83                 | 0                  | 33                                         | 3%                        | 17       | 42       | 363      | 380      | 38%      | 0        | 0        | 725      | 725      | 73%      |
| Shanghai                     | 32                | 62                 | 0                  | 32                                         | 3%                        | 17       | 41       | 333      | 350      | 35%      | 0        | 0        | 667      | 667      | 67%      |
| Beijing                      | 31                | 70                 | 0                  | 31                                         | 3%                        | 16       | 36       | 300      | 316      | 32%      | 0        | 0        | 630      | 630      | 63%      |
| New York                     | 32                | 62                 | 0                  | 32                                         | 3%                        | 17       | 33       | 313      | 330      | 33%      | 0        | 0        | 625      | 625      | 63%      |
| Santiago                     | 31                | 77                 | 0                  | 31                                         | 3%                        | 16       | 55       | 308      | 324      | 32%      | 0        | 0        | 617      | 617      | 62%      |
| Singapore                    | 31                | 87                 | 0                  | 31                                         | 3%                        | 15       | 43       | 292      | 307      | 31%      | 0        | 0        | 583      | 583      | 58%      |
| Bangkok                      | 31                | 95                 | 0                  | 31                                         | 3%                        | 15       | 48       | 296      | 311      | 31%      | 0        | 0        | 592      | 592      | 59%      |
| London                       | 31                | 100                | 0                  | 31                                         | 3%                        | 15       | 50       | 317      | 332      | 33%      | 0        | 0        | 633      | 633      | 63%      |
| Chicago                      | 29                | 80                 | 0                  | 29                                         | 3%                        | 14       | 42       | 250      | 264      | 26%      | 0        | 0        | 500      | 500      | 50%      |
| Toronto                      | 30                | 111                | 0                  | 30                                         | 3%                        | 14       | 56       | 254      | 268      | 27%      | 0        | 0        | 508      | 508      | 51%      |
| Sydney                       | 27                | 62                 | 0                  | 27                                         | 3%                        | 12       | 31       | 221      | 233      | 23%      | 0        | 0        | 442      | 442      | 44%      |
| Auckland                     | 22                | 50                 | 0                  | 22                                         | 2%                        | 11       | 29       | 229      | 240      | 24%      | 0        | 0        | 458      | 458      | 46%      |
| Copenhagen                   | 30                | 125                | 0                  | 30                                         | 3%                        | 14       | 63       | 267      | 281      | 28%      | 0        | 0        | 533      | 533      | 53%      |

93  
 94 **Notations:** APTV - automated PT vehicle, i.e., shared automated bus.  
 95 IAPTV - individual automated PT vehicle, i.e., automated taxi-type company car.  
 96 IAV-PT - individual automated vehicle of local PT service, i.e., automated local  
 97 company car to feed into, or distribute from, an APTV.  
 98  
 99

100  
101  
102**Supplementary Table 7. Number of automated vehicles out of 1000 PCs for two additional cases**

| City<br>(by pop.<br>density) | [%APT <sub>V</sub> , %IAPT <sub>V</sub> ] |                         |                                 |                                            |                           |          |          |          |          |          |
|------------------------------|-------------------------------------------|-------------------------|---------------------------------|--------------------------------------------|---------------------------|----------|----------|----------|----------|----------|
|                              | [75,25]                                   |                         |                                 |                                            |                           | [25,75]  |          |          |          |          |
|                              | APT <sub>V</sub> s<br><i>a</i>            | IAP-<br>PTs<br><i>b</i> | IAPT <sub>V</sub> s<br><i>c</i> | Total<br><i>d</i> =<br><i>a</i> + <i>c</i> | Total<br>in %<br><i>e</i> | <i>a</i> | <i>b</i> | <i>c</i> | <i>d</i> | <i>e</i> |
| Mumbai                       | 22                                        | 94                      | 133                             | 155                                        | 16%                       | 8        | 31       | 400      | 408      | 41%      |
| Paris                        | 22                                        | 83                      | 127                             | 149                                        | 15%                       | 7        | 28       | 381      | 388      | 39%      |
| Seoul                        | 20                                        | 35                      | 131                             | 151                                        | 15%                       | 19       | 35       | 394      | 413      | 41%      |
| Tokyo                        | 25                                        | 52                      | 175                             | 200                                        | 20%                       | 11       | 52       | 525      | 536      | 54%      |
| Mexico City                  | 23                                        | 71                      | 148                             | 171                                        | 17%                       | 11       | 24       | 444      | 455      | 46%      |
| Shanghai                     | 24                                        | 47                      | 156                             | 180                                        | 18%                       | 16       | 33       | 469      | 485      | 49%      |
| Beijing                      | 23                                        | 75                      | 158                             | 181                                        | 18%                       | 8        | 48       | 75       | 83       | 8%       |
| New York                     | 25                                        | 63                      | 181                             | 206                                        | 21%                       | 11       | 41       | 544      | 555      | 56%      |
| Santiago                     | 22                                        | 63                      | 125                             | 147                                        | 15%                       | 7        | 23       | 375      | 382      | 38%      |
| Singapore                    | 24                                        | 47                      | 167                             | 191                                        | 19%                       | 16       | 41       | 500      | 516      | 52%      |
| Bangkok                      | 23                                        | 58                      | 154                             | 177                                        | 18%                       | 8        | 55       | 463      | 471      | 47%      |
| London                       | 24                                        | 68                      | 158                             | 182                                        | 18%                       | 15       | 26       | 475      | 490      | 49%      |
| Chicago                      | 23                                        | 53                      | 156                             | 179                                        | 18%                       | 8        | 27       | 469      | 477      | 48%      |
| Toronto                      | 23                                        | 65                      | 146                             | 169                                        | 17%                       | 10       | 32       | 438      | 448      | 45%      |
| Sydney                       | 21                                        | 47                      | 133                             | 154                                        | 15%                       | 15       | 36       | 400      | 415      | 42%      |
| Auckland                     | 20                                        | 47                      | 110                             | 130                                        | 13%                       | 9        | 22       | 331      | 340      | 34%      |
| Copenhagen                   | 17                                        | 40                      | 115                             | 132                                        | 13%                       | 6        | 23       | 344      | 350      | 35%      |

103  
104

# Scientific Reports

105  
106  
107

**Supplementary Table 8. Information for Supplementary Table 1 with list of references/sources indicated by superscripts**

| Group   | Country      | D <sub>pc</sub><br>(km)        | V <sub>pc</sub><br>(km/h)  | LT <sub>pc</sub><br>(hr/year)  | %LT    | %F                             | %PM2.5                      | %P    | Pop<br>(M)                      | # PCs<br>(M)                  | ALoM |
|---------|--------------|--------------------------------|----------------------------|--------------------------------|--------|--------------------------------|-----------------------------|-------|---------------------------------|-------------------------------|------|
| Asia    | China        | 15,000 <sup>2</sup><br>(2015)* | 26 <sup>58</sup><br>(2016) | 80 <sup>20, 21</sup><br>(2017) | 33.68% | 61.49% <sup>37</sup><br>(2016) | 17% <sup>56</sup><br>(2014) | 93.5% | 1,409.5 <sup>57</sup><br>(2017) | 217.0 <sup>59</sup><br>(2018) | 10   |
|         | Japan        | 18,000 <sup>3</sup><br>(2014)  | 24 <sup>58</sup><br>(2016) | 78 <sup>19</sup><br>(2017)     | 48.00% | 13.99% <sup>38</sup><br>(2016) | 23% <sup>56</sup><br>(2014) | 91.3% | 127.5 <sup>57</sup><br>(2017)   | 78.1 <sup>60</sup><br>(2017)  | 54   |
|         | Singapore    | 16,700 <sup>4</sup><br>(2016)  | 29 <sup>58</sup><br>(2016) | 87 <sup>22</sup><br>(2015)     | 23.73% | 33.77% <sup>39</sup><br>(2016) | 36% <sup>56</sup><br>(2014) | 93.5% | 5.7 <sup>57</sup><br>(2017)     | 1.0 <sup>61</sup><br>(2017)   | 12   |
|         | India        | 20,000 <sup>5</sup><br>(2016)  | 35 <sup>58</sup><br>(2016) | 60 <sup>23</sup><br>(2017)     | 15.82% | 42.82% <sup>40</sup><br>(2016) | 37% <sup>56</sup><br>(2014) | 93.5% | 1,339.2 <sup>57</sup><br>(2017) | 191.0 <sup>62</sup><br>(2016) | 9    |
|         | Korea        | 13,651 <sup>6</sup><br>(2015)  | 32 <sup>58</sup><br>(2016) | 107 <sup>24</sup><br>(2017)    | 34.70% | 57.81% <sup>41</sup><br>(2016) | 23% <sup>56</sup><br>(2014) | 95.2% | 51.0 <sup>57</sup><br>(2017)    | 22.8 <sup>63</sup><br>(2018)  | 22   |
| Oceania | Australia    | 15,530 <sup>7</sup><br>(2013)  | 32 <sup>58</sup><br>(2016) | 94 <sup>25</sup><br>(2013)     | 28.20% | 32.33% <sup>42</sup><br>(2016) | 26% <sup>56</sup><br>(2014) | 94.5% | 24.5 <sup>57</sup><br>(2017)    | 19.2 <sup>64</sup><br>(2018)  | 44   |
|         | New Zealand  | 10,400 <sup>16</sup><br>(2014) | 24 <sup>58</sup><br>(2016) | 80 <sup>26</sup><br>(2018)     | 32.54% | 28.57% <sup>43</sup><br>(2016) | 26% <sup>56</sup><br>(2014) | 95.0% | 4.7 <sup>57</sup><br>(2017)     | 3.8 <sup>65</sup><br>(2015)   | 50   |
| Africa  | South Africa | 20,000 <sup>8</sup><br>(2017)  | 35 <sup>58</sup><br>(2016) | 90 <sup>27</sup><br>(2014)     | 25.71% | 38.84% <sup>44</sup><br>(2016) | 17% <sup>56</sup><br>(2014) | 93.5% | 56.7 <sup>57</sup><br>(2017)    | 12.0 <sup>66</sup><br>(2017)  | 14   |
|         | Egypt        | 14,000 <sup>9</sup><br>(2014)  | 35 <sup>58</sup><br>(2016) | 76 <sup>28</sup><br>(2015)     | 21.71% | 54.35% <sup>45</sup><br>(2016) | 17% <sup>56</sup><br>(2014) | 95.5% | 97.6 <sup>57</sup><br>(2017)    | 9.4 <sup>67</sup><br>(2017)   | 4    |
| America | USA          | 18,000 <sup>10</sup><br>(2015) | 47 <sup>58</sup><br>(2016) | 42 <sup>17</sup><br>(2015)     | 12.76% | 38.30% <sup>46</sup><br>(2016) | 24% <sup>56</sup><br>(2014) | 95.6% | 324.5 <sup>57</sup><br>(2017)   | 268.8 <sup>68</sup><br>(2017) | 36   |
|         | Brazil       | 12,000 <sup>11</sup><br>(2013) | 29 <sup>58</sup><br>(2016) | 36 <sup>29</sup><br>(2018)     | 11.22% | 35.76% <sup>47</sup><br>(2016) | 34% <sup>56</sup><br>(2014) | 95.3% | 209.3 <sup>57</sup><br>(2017)   | 4.3 <sup>69</sup><br>(2018)   | 1    |
|         | Mexico       | 13,000 <sup>12</sup><br>(2015) | 29 <sup>58</sup><br>(2016) | 58 <sup>30</sup><br>(2018)     | 21.42% | 34.34% <sup>48</sup><br>(2016) | 30% <sup>56</sup><br>(2014) | 95.0% | 129.2 <sup>57</sup><br>(2017)   | 43.0 <sup>70</sup><br>(2018)  | 17   |
|         | Canada       | 13,000 <sup>13</sup><br>(2015) | 32 <sup>58</sup><br>(2016) | 74 <sup>31</sup><br>(2010)     | 25.74% | 25.11% <sup>49</sup><br>(2016) | 15% <sup>56</sup><br>(2014) | 95.4% | 36.6 <sup>57</sup><br>(2017)    | 34.3 <sup>71</sup><br>(2017)  | 43   |
| Europe  | UK           | 14,550 <sup>13</sup><br>(2015) | 28 <sup>58</sup><br>(2016) | 30 <sup>18</sup><br>(2015)     | 9.86%  | 21.13% <sup>50</sup><br>(2016) | 25% <sup>56</sup><br>(2014) | 94.1% | 66.2 <sup>57</sup><br>(2017)    | 37.5 <sup>72</sup><br>(2017)  | 33   |
|         | France       | 15,294 <sup>13</sup><br>(2015) | 29 <sup>58</sup><br>(2016) | 70 <sup>32</sup><br>(2018)     | 26.25% | 29.53% <sup>51</sup><br>(2016) | 25% <sup>56</sup><br>(2014) | 94.1% | 65.0 <sup>57</sup><br>(2017)    | 30.5 <sup>73</sup><br>(2017)  | 28   |
|         | Germany      | 14,835 <sup>13</sup><br>(2016) | 29 <sup>58</sup><br>(2016) | 35 <sup>33</sup><br>(2018)     | 14.00% | 19.97% <sup>52</sup><br>(2016) | 19% <sup>56</sup><br>(2014) | 94.2% | 82.1 <sup>57</sup><br>(2017)    | 63.7 <sup>74</sup><br>(2018)  | 45   |
|         | Italy        | 14,000 <sup>14</sup><br>(2014) | 29 <sup>58</sup><br>(2016) | 19 <sup>34</sup><br>(2016)     | 8.29%  | 43.53% <sup>53</sup><br>(2016) | 19% <sup>56</sup><br>(2014) | 94.6% | 59.4 <sup>57</sup><br>(2017)    | 36.8 <sup>75</sup><br>(2016)  | 34   |

|  |        |                               |                            |                            |        |                                |                             |       |                              |                              |    |
|--|--------|-------------------------------|----------------------------|----------------------------|--------|--------------------------------|-----------------------------|-------|------------------------------|------------------------------|----|
|  | Spain  | 4,148 <sup>13</sup><br>(2015) | 29 <sup>58</sup><br>(2016) | 18 <sup>35</sup><br>(2016) | 8.47%  | 31.94% <sup>54</sup><br>(2016) | 35% <sup>56</sup><br>(2014) | 98.4% | 46.4 <sup>57</sup><br>(2017) | 22.1 <sup>76</sup><br>(2015) | 8  |
|  | Poland | 6,672 <sup>15</sup><br>(2015) | 29 <sup>58</sup><br>(2016) | 60 <sup>36</sup><br>(2015) | 25.26% | 33.28% <sup>55</sup><br>(2016) | 17% <sup>56</sup><br>(2014) | 97.4% | 38.2 <sup>57</sup><br>(2017) | 17.2 <sup>77</sup><br>(2017) | 12 |

108

109

**Notations:** PCs = private cars; Pop = population; M = millions;  $D_{pc}$  = average annual driving distance per a PC;

110

$LT_{pc}$  = average annual time lost in traffic congestion per a PC;  $V_{pc}$  = estimated average PC road traffic speed;

111

%LT = percent of total commuting lost time in traffic congestion;

112

%F = percentage of road accident fatalities out of all deaths by accidents;

113

%PM2.5 = percent of PM2.5 from road traffic out of total produced;

114

%P = percentage of time cars park;

115

ALoM = nonstop (24/7) active PCs per 1000 inhabitants.

116

117

\*Year of data shown in each cell of the table; sources of data appear in the following list.

118

119

120

## References/Sources

121

1. [https://en.wikipedia.org/wiki/List\\_of\\_countries\\_by\\_vehicles\\_per\\_capita](https://en.wikipedia.org/wiki/List_of_countries_by_vehicles_per_capita)

122

2. <http://www.wrirosscities.org/sites/default/files/China%20Motorization%20Trends%20-%20Chapter%204.pdf>

123

3. <https://www.statista.com/statistics/645317/japan-share-passenger-car-travel-distance/>

124

4. <https://www.straitstimes.com/lifestyle/motoring/drivers-no-longer-going-the-distance>

125

5. <https://www.quora.com/What-is-the-average-yearly-distance-driven-in-a-passenger-car-in-India>

126

6. <http://www.cvinfo.com/news/articleView.html?idxno=3044> (using Google translation, in Korean)

127

7. <http://www.roymorgan.com/findings/australian-moterists-drive-average-15530km-201305090702>

128

8. <https://investorchallenge.co.za/what-is-the-average-south-africans-biggest-expense/>

129

9. <https://www.vda.de/dam/vda/publications/2015/automation.pdf>

130

10. <https://www.fool.com/investing/general/2015/01/25/the-average-american-drives-this-much-each-year-ho.aspx>

131

11. [onlinepubs.trb.org/Onlinepubs/trr/1983/898/898-057.pdf](http://onlinepubs.trb.org/Onlinepubs/trr/1983/898/898-057.pdf)

132

12. [https://www.ielts.org/-/media/pdfs/115013\\_academic\\_reading\\_sample\\_task\\_-\\_matching\\_information\\_2\\_ashx?la=en](https://www.ielts.org/-/media/pdfs/115013_academic_reading_sample_task_-_matching_information_2_ashx?la=en)

133

13. <https://uk.nissannews.com/en-GB/releases/release-128282-nissan-s-electric-car-drivers-cover-more-miles-than-the-average-petrol-or-diesel-vehicle>

134

14. <https://www.statista.com/statistics/692853/average-annual-distance-covered-by-drivers-in-italy/>

135

15. [ec.europa.eu/environment/enveco/auto-oil/pdf/aopces\\_es.pdf](http://ec.europa.eu/environment/enveco/auto-oil/pdf/aopces_es.pdf)

136

16. <https://transport.govt.nz/assets/Uploads/Research/Documents/Drivers-2015.pdf>

137

17. <https://www.autoinsurancecenter.com/traffic-jammed.htm>

138

18. <https://www.fleetnews.co.uk/news/fleet-industry-news/2016/03/15/uk-drivers-spent-30-hours-in-congestion-in-2015>

139

19. <https://newsphere.jp/economy/20170427-4/> (using Google translation, in Japanese)

140

- 141 20. [http://cn-hangzhou.oss-pub.aliyun-inc.com/download-report/download/yearly\\_report/2017/2017%E5%B9%B4%E4%B8%AD%E5%9B%BD%E4%B8%BB%E8%A6%81%E5%9F%8E%E5%B8%82%E4%BA%A4%E9%80%9A%E5%88%86%E6%9E%90%E6%8A%A5%E5%91%8A-final%E7%89%88.pdf](http://cn-hangzhou.oss-pub.aliyun-inc.com/download-report/download/yearly_report/2017/2017%E5%B9%B4%E4%B8%AD%E5%9B%BD%E4%B8%BB%E8%A6%81%E5%9F%8E%E5%B8%82%E4%BA%A4%E9%80%9A%E5%88%86%E6%9E%90%E6%8A%A5%E5%91%8A-final%E7%89%88.pdf) (using Google translation, in Chinese)
- 142
- 143
- 144
- 145 21. <http://www.chinanews.com/sh/2015/01-26/7005909.shtml> (using Google translation, in Chinese)
- 146 22. <https://mustsharenews.com/time-wasted-on-traffic-jams/>
- 147 23. <https://timesofindia.indiatimes.com/city/bengaluru/10-million-bengalureans-lose-60-crore-hours-rs-3700-crore-a-year-to-road-congestion/articleshow/56368901.cms>
- 148
- 149 24. [http://www.edaily.co.kr/news/news\\_detail.asp?newsId=02430486616057496&mediaCodeNo=257](http://www.edaily.co.kr/news/news_detail.asp?newsId=02430486616057496&mediaCodeNo=257) (using Google translation, in Korean)
- 150 25. <https://www.news.com.au/travel/travel-updates/australian-motorists-spend-94-hours-a-year-in-congestion-totom-traffic-index/news-story/30a81e41178911bffc00f1380383153f>
- 151
- 152 26. <https://www.radionz.co.nz/news/national/351558/commuters-waste-80-hours-stuck-in-traffic>
- 153 27. <https://www.cnbcfrica.com/news/southern-africa/2015/04/02/south-africa-traffic-congestion-totom-index/>
- 154 28. <https://www.systemdynamics.org/assets/conferences/2015/proceed/papers/P1312.pdf>
- 155 29. <https://www.cbsnews.com/pictures/worst-traffic-cities-in-the-world/23/>
- 156 30. <https://www.cbsnews.com/pictures/worst-traffic-cities-in-the-world/11/>
- 157 31. [http://www.wikiwand.com/en/Traffic\\_congestion](http://www.wikiwand.com/en/Traffic_congestion)
- 158 32. <http://inrix.com/press-releases/2661/>
- 159 33. <http://inrix.com/press-releases/2663/>
- 160 34. <https://www.wantedinmilan.com/news/milan-italys-worst-for-traffic.html>
- 161 35. <https://www.autoescuelago.com/ciudades-atascos/> (using Google translation, in Spanish)
- 162 36. [www.inrixtraffic.com/feed/](http://www.inrixtraffic.com/feed/)
- 163 37. <https://www.worldlifeexpectancy.com/country-health-profile/china>
- 164 38. <https://www.worldlifeexpectancy.com/country-health-profile/japan>
- 165 39. <https://www.worldlifeexpectancy.com/country-health-profile/singapore>
- 166 40. <https://www.worldlifeexpectancy.com/country-health-profile/india>
- 167 41. <https://www.worldlifeexpectancy.com/country-health-profile/korea>
- 168 42. <https://www.worldlifeexpectancy.com/country-health-profile/australia>
- 169 43. <https://www.worldlifeexpectancy.com/country-health-profile/new-zealand>
- 170 44. <https://www.worldlifeexpectancy.com/country-health-profile/south-africa>
- 171 45. <https://www.worldlifeexpectancy.com/country-health-profile/egypt>
- 172 46. <https://www.worldlifeexpectancy.com/country-health-profile/united-states>
- 173 47. <https://www.worldlifeexpectancy.com/country-health-profile/brazil>
- 174 48. <https://www.worldlifeexpectancy.com/country-health-profile/mexico>
- 175 49. <https://www.worldlifeexpectancy.com/country-health-profile/canada>
- 176 50. <https://www.worldlifeexpectancy.com/country-health-profile/united-kingdom>
- 177 51. <https://www.worldlifeexpectancy.com/country-health-profile/france>
- 178 52. <https://www.worldlifeexpectancy.com/country-health-profile/germany>
- 179 53. <https://www.worldlifeexpectancy.com/country-health-profile/italy>
- 180 54. <https://www.worldlifeexpectancy.com/country-health-profile/spain>

- 181 55. <https://www.worldlifeexpectancy.com/country-health-profile/poland>
- 182 56. Karagulian, F., Belis, C. A., Dora, C. F. C., Prüss-Ustün, A. M., Bonjour, S., Adair-Rohani, H., & Amann, M. (2015). Contributions to cities' ambient particulate matter (PM): A systematic review of local source contributions at global level. *Atmospheric environment*, 120, 475-483.
- 183
- 184 57. [https://en.wikipedia.org/wiki/List\\_of\\_countries\\_by\\_population](https://en.wikipedia.org/wiki/List_of_countries_by_population)
- 185 58. <http://chartsbin.com/view/41749>
- 186 59. <https://www.statista.com/statistics/285306/number-of-car-owners-in-china/>
- 187 60. <https://www.statista.com/statistics/674574/japan-motor-vehicle-in-use-numbers/>
- 188 61. <https://www.singstat.gov.sg/-/media/files/publications/households/pp-s24.pdf>
- 189 62. <https://www.statista.com/statistics/664729/total-number-of-vehicles-india/>
- 190 63. <https://www.ceicdata.com/en/korea/number-of-registered-motor-vehicles/registered-motor-vehicles>
- 191 64. <https://www.abs.gov.au/ausstats/abs@.nsf/mf/9309.0>
- 192 65. <http://www.ehinz.ac.nz/assets/Factsheets/Released-2017/EHI8-9-NumberOfVehiclesInNZ2000-2015-release-201701.pdf>
- 193 66. [https://www.wheels24.co.za/News/Industry\\_News/youll-never-guess-how-many-vehicles-are-registered-in-sa-20170328](https://www.wheels24.co.za/News/Industry_News/youll-never-guess-how-many-vehicles-are-registered-in-sa-20170328)
- 194 67. <http://english.ahram.org.eg/NewsContent/1/64/270451/Egypt/Politics/-/million-licensed-vehicles-in-Egypt-CAPMAS.aspx>
- 195 68. [https://www.census.gov/history/www/homepage\\_archive/2018/october\\_2018.html](https://www.census.gov/history/www/homepage_archive/2018/october_2018.html)
- 196 69. <https://www.volkswagen-newsroom.com/en/press-releases/volkswagen-group-deliveries-reach-all-time-high-392>
- 197 70. <https://oxfordre.com/latinamericanhistory/view/10.1093/acrefore/9780199366439.001.0001/acrefore-9780199366439-e-456>
- 198 71. <https://www150.statcan.gc.ca/n1/daily-quotidien/180615/dq180615e-eng.htm>
- 199 72. <https://www.gov.uk/government/statistics/vehicle-licensing-statistics-january-to-march-2017>
- 200 73. <https://www.statista.com/statistics/455887/passenger-cars-registered-in-france/>
- 201 74. <https://www.best-selling-cars.com/germany/2018-germany-total-number-registered-cars/>
- 202 75. <https://knoema.com/atlas/ranks/Private-car-theft-rate>
- 203 76. <https://www.statista.com/statistics/452310/spain-number-of-registered-passenger-cars/>
- 204 77. [https://www.acea.be/uploads/statistic\\_documents/ACEA\\_Report\\_Vehicles\\_in\\_use-Europe\\_2017.pdf](https://www.acea.be/uploads/statistic_documents/ACEA_Report_Vehicles_in_use-Europe_2017.pdf)
- 205

**Supplementary Table 9. Information on data sources and input data for ArcGIS 10.3.1**

206  
207  
208  
209  
210  
211  
212  
213

**Notes:**

- (a) The speeds of all main/major/general roads are average speeds as they appear in the sources.  
 (b) The speeds appearing for the main/minor/general roads are those found for the majority (or all) of the roads.  
 (c) Sources could not be found for some of the minor roads, and thus, their design speed was assumed.  
 (d) General speed is for a general category road between main and minor roads.  
 (e) Restraining and congestion refer to data on traffic congestion and/or traffic restrictions.

**City City name (by pop. density)**

|                 |                          |               |                                                                                                                                                                                                                                                                                                                                                                                                                                                                                                                                                                                                                           |
|-----------------|--------------------------|---------------|---------------------------------------------------------------------------------------------------------------------------------------------------------------------------------------------------------------------------------------------------------------------------------------------------------------------------------------------------------------------------------------------------------------------------------------------------------------------------------------------------------------------------------------------------------------------------------------------------------------------------|
| <b>1 Mumbai</b> | Map                      | OpenStreetMap | <a href="http://www.openstreetmap.org.nz/">http://www.openstreetmap.org.nz/</a>                                                                                                                                                                                                                                                                                                                                                                                                                                                                                                                                           |
|                 |                          | Google Map    | <a href="https://www.google.com/maps">maps.google.com</a>                                                                                                                                                                                                                                                                                                                                                                                                                                                                                                                                                                 |
|                 |                          | TomTom City   | <a href="https://www.tomtom.com/en_gb/traffic-news/">https://www.tomtom.com/en_gb/traffic-news/</a>                                                                                                                                                                                                                                                                                                                                                                                                                                                                                                                       |
|                 |                          | World Map     | <a href="http://www.arcgis.com/home/item.html?id=94f838a535334cf1aa061846514b77c7">http://www.arcgis.com/home/item.html?id=94f838a535334cf1aa061846514b77c7</a>                                                                                                                                                                                                                                                                                                                                                                                                                                                           |
|                 | Main road speed          | 17 km/hr      | <a href="https://www.tomtom.com/en_gb/traffic-news/mumbai-traffic/traffic-flow">https://www.tomtom.com/en_gb/traffic-news/mumbai-traffic/traffic-flow</a>                                                                                                                                                                                                                                                                                                                                                                                                                                                                 |
|                 | Minor road speed         | 20 km/hr      | <a href="https://www.tomtom.com/en_gb/traffic-news/mumbai-traffic/traffic-flow">https://www.tomtom.com/en_gb/traffic-news/mumbai-traffic/traffic-flow</a>                                                                                                                                                                                                                                                                                                                                                                                                                                                                 |
|                 | General speed            | 25 km/hr      | <a href="https://www.tomtom.com/en_gb/traffic-news/mumbai-traffic/traffic-flow">https://www.tomtom.com/en_gb/traffic-news/mumbai-traffic/traffic-flow</a>                                                                                                                                                                                                                                                                                                                                                                                                                                                                 |
|                 | Restraining & congestion |               | <a href="https://timesofindia.indiatimes.com/topic/Traffic-congestion-in-Mumbai">https://timesofindia.indiatimes.com/topic/Traffic-congestion-in-Mumbai</a><br><a href="https://timesofindia.indiatimes.com/city/delhi/congestion-fee-to-unclog-some-roads/articleshow/61886317.cms">https://timesofindia.indiatimes.com/city/delhi/congestion-fee-to-unclog-some-roads/articleshow/61886317.cms</a> -                                                                                                                                                                                                                    |
|                 | All PT timetables        |               |                                                                                                                                                                                                                                                                                                                                                                                                                                                                                                                                                                                                                           |
|                 | Other                    |               | <a href="https://en.wikipedia.org/wiki/Public_transport_in_Mumbai">https://en.wikipedia.org/wiki/Public_transport_in_Mumbai</a>                                                                                                                                                                                                                                                                                                                                                                                                                                                                                           |
| <b>2 Paris</b>  | Map                      | OpenStreetMap | <a href="http://www.openstreetmap.org.nz/">http://www.openstreetmap.org.nz/</a>                                                                                                                                                                                                                                                                                                                                                                                                                                                                                                                                           |
|                 |                          | Google Map    | <a href="https://www.google.com/maps">maps.google.com</a>                                                                                                                                                                                                                                                                                                                                                                                                                                                                                                                                                                 |
|                 |                          | TomTom City   | <a href="https://www.tomtom.com/en_gb/traffic-news/">https://www.tomtom.com/en_gb/traffic-news/</a>                                                                                                                                                                                                                                                                                                                                                                                                                                                                                                                       |
|                 |                          | World Map     | <a href="http://www.arcgis.com/home/item.html?id=94f838a535334cf1aa061846514b77c7">http://www.arcgis.com/home/item.html?id=94f838a535334cf1aa061846514b77c7</a>                                                                                                                                                                                                                                                                                                                                                                                                                                                           |
|                 | Main road speed          | 23 km/hr      | <a href="https://www.tomtom.com/en_gb/traffic-news/paris-traffic/traffic-flow">https://www.tomtom.com/en_gb/traffic-news/paris-traffic/traffic-flow</a><br><a href="http://www.parisaeroport.fr/docs/default-source/groupe-fichiers/presse/cp-juillet-septembre-2017/pr-12092017-traffic-figures-august-2017.pdf?sfvrsn=2">http://www.parisaeroport.fr/docs/default-source/groupe-fichiers/presse/cp-juillet-septembre-2017/pr-12092017-traffic-figures-august-2017.pdf?sfvrsn=2</a><br><a href="https://www.franceix.net/en/technical/traffic-statistics/">https://www.franceix.net/en/technical/traffic-statistics/</a> |
|                 | Minor road speed         | 30 km/hr      | <a href="https://www.tomtom.com/en_gb/traffic-news/paris-traffic/traffic-flow">https://www.tomtom.com/en_gb/traffic-news/paris-traffic/traffic-flow</a>                                                                                                                                                                                                                                                                                                                                                                                                                                                                   |
|                 | General speed            | 27 km/hr      | <a href="https://www.tomtom.com/en_gb/traffic-news/paris-traffic/traffic-flow">https://www.tomtom.com/en_gb/traffic-news/paris-traffic/traffic-flow</a><br><a href="http://www.parisaeroport.fr/en/group/finance/investor-relations/traffic">http://www.parisaeroport.fr/en/group/finance/investor-relations/traffic</a>                                                                                                                                                                                                                                                                                                  |
|                 | Restraining & congestion |               | <a href="https://www.tomtom.com/en_gb/traffic-news/paris-traffic/traffic-flow">https://www.tomtom.com/en_gb/traffic-news/paris-traffic/traffic-flow</a><br><a href="http://ec.europa.eu/eurostat/statistics-">http://ec.europa.eu/eurostat/statistics-</a>                                                                                                                                                                                                                                                                                                                                                                |

|                      |                          |               |  |                                                                                                                                                                                                                                                                                                                                                                                                                                                                                                                                                                                                                                                                                                                                                                                                                                            |
|----------------------|--------------------------|---------------|--|--------------------------------------------------------------------------------------------------------------------------------------------------------------------------------------------------------------------------------------------------------------------------------------------------------------------------------------------------------------------------------------------------------------------------------------------------------------------------------------------------------------------------------------------------------------------------------------------------------------------------------------------------------------------------------------------------------------------------------------------------------------------------------------------------------------------------------------------|
|                      | All PT timetables        |               |  | <a href="http://www.asianhumannet.org/db/datas/10_transport/planning_en.pdf">http://www.asianhumannet.org/db/datas/10_transport/planning_en.pdf</a>                                                                                                                                                                                                                                                                                                                                                                                                                                                                                                                                                                                                                                                                                        |
|                      | Other                    |               |  |                                                                                                                                                                                                                                                                                                                                                                                                                                                                                                                                                                                                                                                                                                                                                                                                                                            |
| <b>3 Seoul</b>       | Map                      | OpenStreetMap |  | <a href="http://www.openstreetmap.org/nz/">http://www.openstreetmap.org/nz/</a>                                                                                                                                                                                                                                                                                                                                                                                                                                                                                                                                                                                                                                                                                                                                                            |
|                      |                          | Google Map    |  | <a href="https://www.google.com/maps">maps.google.com</a>                                                                                                                                                                                                                                                                                                                                                                                                                                                                                                                                                                                                                                                                                                                                                                                  |
|                      |                          | TomTom City   |  | <a href="https://www.tomtom.com/en_gb/traffic-news/">https://www.tomtom.com/en_gb/traffic-news/</a>                                                                                                                                                                                                                                                                                                                                                                                                                                                                                                                                                                                                                                                                                                                                        |
|                      |                          | World Map     |  | <a href="http://www.arcgis.com/home/item.html?id=94f838a535334cf1aa061846514b77c7">http://www.arcgis.com/home/item.html?id=94f838a535334cf1aa061846514b77c7</a>                                                                                                                                                                                                                                                                                                                                                                                                                                                                                                                                                                                                                                                                            |
|                      | Main road speed          | 15 km/hr      |  | <a href="https://english.koti.re.kr/">https://english.koti.re.kr/</a>                                                                                                                                                                                                                                                                                                                                                                                                                                                                                                                                                                                                                                                                                                                                                                      |
|                      | Minor road speed         | 23 km/hr      |  | <a href="https://english.koti.re.kr/">https://english.koti.re.kr/</a>                                                                                                                                                                                                                                                                                                                                                                                                                                                                                                                                                                                                                                                                                                                                                                      |
|                      | General speed            | 28 km/hr      |  | <a href="https://github.com/SeoulTech/open-data-seoul#transportation">https://github.com/SeoulTech/open-data-seoul#transportation</a><br><a href="https://www.data.go.kr/search/index.do">https://www.data.go.kr/search/index.do</a>                                                                                                                                                                                                                                                                                                                                                                                                                                                                                                                                                                                                       |
|                      | Restraining & congestion |               |  | <a href="http://www.unikorea.go.kr/eng_unikorea/relations/statistics/traffic/">http://www.unikorea.go.kr/eng_unikorea/relations/statistics/traffic/</a>                                                                                                                                                                                                                                                                                                                                                                                                                                                                                                                                                                                                                                                                                    |
|                      | All PT timetables        |               |  | <a href="http://topis.seoul.go.kr/eng/english.jsp">http://topis.seoul.go.kr/eng/english.jsp</a>                                                                                                                                                                                                                                                                                                                                                                                                                                                                                                                                                                                                                                                                                                                                            |
|                      | Other                    |               |  | <a href="http://english.seoul.go.kr/policy-information/traffic/major-traffic-statistics/">http://english.seoul.go.kr/policy-information/traffic/major-traffic-statistics/</a>                                                                                                                                                                                                                                                                                                                                                                                                                                                                                                                                                                                                                                                              |
| <b>4 Tokyo</b>       | Map                      | OpenStreetMap |  | <a href="http://www.openstreetmap.org/nz/">http://www.openstreetmap.org/nz/</a>                                                                                                                                                                                                                                                                                                                                                                                                                                                                                                                                                                                                                                                                                                                                                            |
|                      |                          | Google Map    |  | <a href="https://www.google.com/maps">maps.google.com</a>                                                                                                                                                                                                                                                                                                                                                                                                                                                                                                                                                                                                                                                                                                                                                                                  |
|                      |                          | TomTom City   |  | <a href="https://www.tomtom.com/en_gb/traffic-news/">https://www.tomtom.com/en_gb/traffic-news/</a>                                                                                                                                                                                                                                                                                                                                                                                                                                                                                                                                                                                                                                                                                                                                        |
|                      |                          | World Map     |  | <a href="http://www.arcgis.com/home/item.html?id=94f838a535334cf1aa061846514b77c7">http://www.arcgis.com/home/item.html?id=94f838a535334cf1aa061846514b77c7</a>                                                                                                                                                                                                                                                                                                                                                                                                                                                                                                                                                                                                                                                                            |
|                      | Main road speed          | 18.5 km/h     |  | <a href="http://journal.jp.fujitsu.com/en/2015/08/27/01/">http://journal.jp.fujitsu.com/en/2015/08/27/01/</a>                                                                                                                                                                                                                                                                                                                                                                                                                                                                                                                                                                                                                                                                                                                              |
|                      | Minor road speed         | 22 km/hr      |  | <a href="http://www.trafficindex.org/tokyo/">http://www.trafficindex.org/tokyo/</a>                                                                                                                                                                                                                                                                                                                                                                                                                                                                                                                                                                                                                                                                                                                                                        |
|                      | General speed            | 30 km/hr      |  |                                                                                                                                                                                                                                                                                                                                                                                                                                                                                                                                                                                                                                                                                                                                                                                                                                            |
|                      | Restraining & congestion |               |  | <a href="http://nlftp.mlit.go.jp/ksj-e/gml/datalist/KsjTmplt-S05-c.html">http://nlftp.mlit.go.jp/ksj-e/gml/datalist/KsjTmplt-S05-c.html</a><br><a href="https://www.distancecalculator.net/from-osaka-shi-to-tokyo">https://www.distancecalculator.net/from-osaka-shi-to-tokyo</a><br><a href="http://nlftp.mlit.go.jp/ksj-e/gml/cgi-bin/download.php">http://nlftp.mlit.go.jp/ksj-e/gml/cgi-bin/download.php</a><br><a href="http://nlftp.mlit.go.jp/ksj-e/gml/datalist/KsjTmplt-S05-c.html">http://nlftp.mlit.go.jp/ksj-e/gml/datalist/KsjTmplt-S05-c.html</a><br><a href="http://trafficdata.iis.u-tokyo.ac.jp/repository.php?loc=66">http://trafficdata.iis.u-tokyo.ac.jp/repository.php?loc=66</a><br><a href="http://www.mlit.go.jp/road/management-e/e_pdf/0403_3.pdf">http://www.mlit.go.jp/road/management-e/e_pdf/0403_3.pdf</a> |
|                      | All PT timetables        |               |  | <a href="http://www.asianhumannet.org/db/datas/10_transport/planning_en.pdf">http://www.asianhumannet.org/db/datas/10_transport/planning_en.pdf</a>                                                                                                                                                                                                                                                                                                                                                                                                                                                                                                                                                                                                                                                                                        |
|                      | Other                    |               |  |                                                                                                                                                                                                                                                                                                                                                                                                                                                                                                                                                                                                                                                                                                                                                                                                                                            |
| <b>5 Mexico City</b> | Map                      | OpenStreetMap |  | <a href="http://www.openstreetmap.org/nz/">http://www.openstreetmap.org/nz/</a>                                                                                                                                                                                                                                                                                                                                                                                                                                                                                                                                                                                                                                                                                                                                                            |
|                      |                          | Google Map    |  | <a href="https://www.google.com/maps">maps.google.com</a>                                                                                                                                                                                                                                                                                                                                                                                                                                                                                                                                                                                                                                                                                                                                                                                  |
|                      |                          | TomTom City   |  | <a href="https://www.tomtom.com/en_gb/traffic-news/">https://www.tomtom.com/en_gb/traffic-news/</a>                                                                                                                                                                                                                                                                                                                                                                                                                                                                                                                                                                                                                                                                                                                                        |
|                      |                          | World Map     |  | <a href="http://www.arcgis.com/home/item.html?id=94f838a535334cf1aa061846514b77c7">http://www.arcgis.com/home/item.html?id=94f838a535334cf1aa061846514b77c7</a>                                                                                                                                                                                                                                                                                                                                                                                                                                                                                                                                                                                                                                                                            |



|                   |                          |                          |                                                                                                                                                                                                                                                                                                                                                                                |                                                                                                                                                                                                                                                                                                                                                                             |
|-------------------|--------------------------|--------------------------|--------------------------------------------------------------------------------------------------------------------------------------------------------------------------------------------------------------------------------------------------------------------------------------------------------------------------------------------------------------------------------|-----------------------------------------------------------------------------------------------------------------------------------------------------------------------------------------------------------------------------------------------------------------------------------------------------------------------------------------------------------------------------|
|                   | Main road speed          | 17 km/hr                 | <a href="https://www.tomtom.com/en_gb/traffic-news/mexico-city-traffic/traffic-flow">https://www.tomtom.com/en_gb/traffic-news/mexico-city-traffic/traffic-flow</a>                                                                                                                                                                                                            |                                                                                                                                                                                                                                                                                                                                                                             |
|                   | Minor road speed         | 20 km/hr                 | <a href="https://www.tomtom.com/en_gb/traffic-news/mexico-city-traffic/traffic-flow">https://www.tomtom.com/en_gb/traffic-news/mexico-city-traffic/traffic-flow</a>                                                                                                                                                                                                            |                                                                                                                                                                                                                                                                                                                                                                             |
|                   | General speed            | 23 km/hr                 | <a href="https://www.tomtom.com/en_gb/traffic-news/mexico-city-traffic/traffic-flow">https://www.tomtom.com/en_gb/traffic-news/mexico-city-traffic/traffic-flow</a>                                                                                                                                                                                                            |                                                                                                                                                                                                                                                                                                                                                                             |
|                   | Restraining & congestion |                          | <a href="https://www.tomtom.com/en_gb/traffic-news/mexico-city-traffic/traffic-flow">https://www.tomtom.com/en_gb/traffic-news/mexico-city-traffic/traffic-flow</a><br><a href="https://www.transitwiki.org/TransitWiki/index.php/Publicly">https://www.transitwiki.org/TransitWiki/index.php/Publicly</a>                                                                     |                                                                                                                                                                                                                                                                                                                                                                             |
|                   | Other                    |                          | <a href="http://www.accessmagazine.org/articles/spring-2015/suburban-transit-in-mexico-city/">http://www.accessmagazine.org/articles/spring-2015/suburban-transit-in-mexico-city/</a><br><a href="http://www.accessmagazine.org/articles/spring-2015/suburban-transit-in-mexico-city/">http://www.accessmagazine.org/articles/spring-2015/suburban-transit-in-mexico-city/</a> |                                                                                                                                                                                                                                                                                                                                                                             |
| <b>6 Shanghai</b> | Map                      | OpeStreetMap             | <a href="http://www.openstreetmap.org.nz/">http://www.openstreetmap.org.nz/</a>                                                                                                                                                                                                                                                                                                |                                                                                                                                                                                                                                                                                                                                                                             |
|                   |                          | Google Map               | <a href="https://maps.google.com">maps.google.com</a>                                                                                                                                                                                                                                                                                                                          |                                                                                                                                                                                                                                                                                                                                                                             |
|                   |                          | Baidu Map                | <a href="https://maps.baidu.com/">https://maps.baidu.com/</a>                                                                                                                                                                                                                                                                                                                  |                                                                                                                                                                                                                                                                                                                                                                             |
|                   |                          | Part of the map          | <a href="http://download.csdn.net/download/u012222998/6309629">http://download.csdn.net/download/u012222998/6309629</a>                                                                                                                                                                                                                                                        |                                                                                                                                                                                                                                                                                                                                                                             |
|                   |                          | Gaode Map                | <a href="https://ditu.amap.com/">https://ditu.amap.com/</a>                                                                                                                                                                                                                                                                                                                    |                                                                                                                                                                                                                                                                                                                                                                             |
|                   |                          | World Map                | <a href="http://www.arcgis.com/home/item.html?id=94f838a535334cf1aa061846514b77c7">http://www.arcgis.com/home/item.html?id=94f838a535334cf1aa061846514b77c7</a>                                                                                                                                                                                                                |                                                                                                                                                                                                                                                                                                                                                                             |
|                   |                          | Main road speed          | 13-17 km/hr                                                                                                                                                                                                                                                                                                                                                                    | <a href="http://www.jtcx.sh.cn/trafficanalyse.html">http://www.jtcx.sh.cn/trafficanalyse.html</a>                                                                                                                                                                                                                                                                           |
|                   |                          | General speed            | 15 km/hr                                                                                                                                                                                                                                                                                                                                                                       | <a href="https://wenku.baidu.com/view/d591ccd06037ee06eff9aef8941ea76e58fa4ae5.html">https://wenku.baidu.com/view/d591ccd06037ee06eff9aef8941ea76e58fa4ae5.html</a><br><a href="http://www.sohu.com/a/131413091_182825">http://www.sohu.com/a/131413091_182825</a><br><a href="http://www.jfdaily.com/news/detail?id=50054">http://www.jfdaily.com/news/detail?id=50054</a> |
|                   |                          | Restraining & congestion |                                                                                                                                                                                                                                                                                                                                                                                | <a href="http://sh.sina.com.cn/news/m/2018-01-19/detail-ifyqtzwu6809008-p5.shtml?from=wap">http://sh.sina.com.cn/news/m/2018-01-19/detail-ifyqtzwu6809008-p5.shtml?from=wap</a><br><a href="http://report.amap.com/predict/holiday/predict.do#">http://report.amap.com/predict/holiday/predict.do#</a>                                                                      |
|                   |                          | All PT timetables        |                                                                                                                                                                                                                                                                                                                                                                                | A few stops chosen to calculate average bus travel time.<br><br><a href="http://bus.mapbar.com/shanghai/xianlu/">http://bus.mapbar.com/shanghai/xianlu/</a><br>Subway system travel speed, 60 km/hr<br><a href="https://wenku.baidu.com/view/6762c56c87c24028905fc338.html">https://wenku.baidu.com/view/6762c56c87c24028905fc338.html</a>                                  |
| <b>7 Beijing</b>  | Map                      | OpenStreetMap            | <a href="http://www.openstreetmap.org.nz/">http://www.openstreetmap.org.nz/</a>                                                                                                                                                                                                                                                                                                |                                                                                                                                                                                                                                                                                                                                                                             |
|                   |                          | Google Map               | <a href="https://maps.google.com">maps.google.com</a>                                                                                                                                                                                                                                                                                                                          |                                                                                                                                                                                                                                                                                                                                                                             |
|                   |                          | Baidu Map                | <a href="https://maps.baidu.com/">https://maps.baidu.com/</a>                                                                                                                                                                                                                                                                                                                  |                                                                                                                                                                                                                                                                                                                                                                             |
|                   |                          | Map of Beijing           | <a href="http://www.pudn.com/Download/item/id/1722941.html">http://www.pudn.com/Download/item/id/1722941.html</a>                                                                                                                                                                                                                                                              |                                                                                                                                                                                                                                                                                                                                                                             |
|                   |                          | World Map                | <a href="http://www.arcgis.com/home/item.html?id=94f838a535334cf1aa061846514b77c7">http://www.arcgis.com/home/item.html?id=94f838a535334cf1aa061846514b77c7</a>                                                                                                                                                                                                                |                                                                                                                                                                                                                                                                                                                                                                             |
|                   | Average travel speed     | 15 km/hr                 | <a href="https://www.tomtom.com/en_gb/traffic-index/beijing-traffic">https://www.tomtom.com/en_gb/traffic-index/beijing-traffic</a>                                                                                                                                                                                                                                            |                                                                                                                                                                                                                                                                                                                                                                             |
|                   | Restraining & congestion |                          | <a href="http://www.bjdata.gov.cn/cms/web/download/NohistoryDownload.jsp?articleID=4677">http://www.bjdata.gov.cn/cms/web/download/NohistoryDownload.jsp?articleID=4677</a><br><a href="http://www.bjdata.gov.cn/cms/web/bjdata/loginDoSomething/dengluLogin.jsp">http://www.bjdata.gov.cn/cms/web/bjdata/loginDoSomething/dengluLogin.jsp</a>                                 |                                                                                                                                                                                                                                                                                                                                                                             |

|                        |                                                     |                                                         |                                                                                                                                                                                                                                                                                                                                                                                                                                                                                                                                                                                                                                                   |
|------------------------|-----------------------------------------------------|---------------------------------------------------------|---------------------------------------------------------------------------------------------------------------------------------------------------------------------------------------------------------------------------------------------------------------------------------------------------------------------------------------------------------------------------------------------------------------------------------------------------------------------------------------------------------------------------------------------------------------------------------------------------------------------------------------------------|
|                        | PT-Subway                                           |                                                         | Use the timetables to get the average travel speed between stations. Average wait time is 2 minutes.<br><a href="http://map.sogou.com/index.html#c=12940924,4859575,11&amp;lq=%u5730%u94C1%u660C%u5E73%u7EBF&amp;where=12913250,4840656.25,12974750,4873093.75,0&amp;page=1,10">http://map.sogou.com/index.html#c=12940924,4859575,11&amp;lq=%u5730%u94C1%u660C%u5E73%u7EBF&amp;where=12913250,4840656.25,12974750,4873093.75,0&amp;page=1,10</a><br>Train travel at 80 km/hr.<br>A few stops selected to calculate average bus travel time.                                                                                                      |
|                        | Bus timetables                                      |                                                         | <a href="http://bus.mapbar.com/beijing/xianlu/">http://bus.mapbar.com/beijing/xianlu/</a><br><a href="http://www.baidu.com/link?url=JHYvgK_bulnvt6EPljx3AlZY34faVlbnXDQT-PdHDYlkyhX6iYT_18Kj1psxVOfSI99VcQPjwgXE8W9yeAF_rxeFjoiCdCnPJA5mY4WUHeG&amp;wd=&amp;eqid=fb29479c0070e3de000000045891aea7">http://www.baidu.com/link?url=JHYvgK_bulnvt6EPljx3AlZY34faVlbnXDQT-PdHDYlkyhX6iYT_18Kj1psxVOfSI99VcQPjwgXE8W9yeAF_rxeFjoiCdCnPJA5mY4WUHeG&amp;wd=&amp;eqid=fb29479c0070e3de000000045891aea7</a>                                                                                                                                                |
| <b>8 New York City</b> | Other                                               |                                                         |                                                                                                                                                                                                                                                                                                                                                                                                                                                                                                                                                                                                                                                   |
|                        | Map                                                 | OpenStreetMap<br>Google Map<br>Government data          | <a href="http://www.openstreetmap.org/nz/">http://www.openstreetmap.org/nz/</a><br><a href="https://maps.google.com">maps.google.com</a><br><a href="https://opendata.cityofnewyork.us/">https://opendata.cityofnewyork.us/</a><br><a href="https://data.cityofnewyork.us/City-Government/Georeferenced-NYC-Zoning-Maps/mxbm-493w">https://data.cityofnewyork.us/City-Government/Georeferenced-NYC-Zoning-Maps/mxbm-493w</a>                                                                                                                                                                                                                      |
|                        |                                                     | PT Map<br>World Map                                     | <a href="https://data.cityofnewyork.us/Transportation/Subway-Stations/arq3-7z49">https://data.cityofnewyork.us/Transportation/Subway-Stations/arq3-7z49</a><br><a href="http://www.arcgis.com/home/item.html?id=94f838a535334cf1aa061846514b77c7">http://www.arcgis.com/home/item.html?id=94f838a535334cf1aa061846514b77c7</a><br><a href="https://data.cityofnewyork.us/Transportation/Real-Time-Traffic-Speed-Data/qkm5-nuaq">https://data.cityofnewyork.us/Transportation/Real-Time-Traffic-Speed-Data/qkm5-nuaq</a>                                                                                                                           |
|                        | Average travel speed<br>Restraining &<br>congestion | 8-12 km/hr<br>Government data                           | <a href="https://data.cityofnewyork.us/Transportation/Real-Time-Traffic-Speed-Data/qkm5-nuaq">https://data.cityofnewyork.us/Transportation/Real-Time-Traffic-Speed-Data/qkm5-nuaq</a>                                                                                                                                                                                                                                                                                                                                                                                                                                                             |
|                        |                                                     | Real time data                                          | <a href="http://dotsignals.org/">http://dotsignals.org/</a>                                                                                                                                                                                                                                                                                                                                                                                                                                                                                                                                                                                       |
|                        | PT-Subway<br>Bus timetables<br>Other                | Real time data<br>PT data                               | <a href="http://dotsignals.org/">http://dotsignals.org/</a><br><a href="https://data.cityofnewyork.us/Transportation/Subway-Stations/arq3-7z49">https://data.cityofnewyork.us/Transportation/Subway-Stations/arq3-7z49</a><br><a href="http://www.chinadaily.com.cn/china/2012cpc/2012-11/10/content_15910395.htm">http://www.chinadaily.com.cn/china/2012cpc/2012-11/10/content_15910395.htm</a>                                                                                                                                                                                                                                                 |
| <b>9 Santiago</b>      | Map                                                 | OpenStreetMap<br>Google Map<br>TomTom City<br>World Map | <a href="http://www.openstreetmap.org/nz/">http://www.openstreetmap.org/nz/</a><br><a href="https://maps.google.com">maps.google.com</a><br><a href="https://www.tomtom.com/en_gb/traffic-news/">https://www.tomtom.com/en_gb/traffic-news/</a><br><a href="http://www.arcgis.com/home/item.html?id=94f838a535334cf1aa061846514b77c7">http://www.arcgis.com/home/item.html?id=94f838a535334cf1aa061846514b77c7</a><br><a href="https://www.viamichelin.com/web/Traffic/Traffic_info-Santiago_-_Region_Metropolitana_de_Santiago-Chile">https://www.viamichelin.com/web/Traffic/Traffic_info-Santiago_-_Region_Metropolitana_de_Santiago-Chile</a> |
|                        | Main road speed                                     | 21 km/hr                                                | <a href="https://www.caminoadventures.com/camino-de-santiago-statistics/">https://www.caminoadventures.com/camino-de-santiago-statistics/</a>                                                                                                                                                                                                                                                                                                                                                                                                                                                                                                     |

|                     |                          |                                                         |                                                                                                                                                                                                                                                                                                                                                                                                                                                                                                                           |
|---------------------|--------------------------|---------------------------------------------------------|---------------------------------------------------------------------------------------------------------------------------------------------------------------------------------------------------------------------------------------------------------------------------------------------------------------------------------------------------------------------------------------------------------------------------------------------------------------------------------------------------------------------------|
|                     |                          |                                                         | <a href="https://www.waze.com/driverindex">https://www.waze.com/driverindex</a>                                                                                                                                                                                                                                                                                                                                                                                                                                           |
|                     | Minor road speed         | 27 km/hr                                                |                                                                                                                                                                                                                                                                                                                                                                                                                                                                                                                           |
|                     | General speed            | 24 km/hr                                                | <a href="https://www.caminoadventures.com/camino-de-santiago-statistics/">https://www.caminoadventures.com/camino-de-santiago-statistics/</a>                                                                                                                                                                                                                                                                                                                                                                             |
|                     | Restraining & congestion |                                                         |                                                                                                                                                                                                                                                                                                                                                                                                                                                                                                                           |
|                     | Other                    |                                                         | <a href="http://www.worldbank.org/en/results/2013/04/11/Urban-Transport-in-Santiago">http://www.worldbank.org/en/results/2013/04/11/Urban-Transport-in-Santiago</a><br><a href="http://unhabitat.org/wp-content/uploads/2013/06/GRHS.2013.Case_Study_Santiago.Chile_.pdf">http://unhabitat.org/wp-content/uploads/2013/06/GRHS.2013.Case_Study_Santiago.Chile_.pdf</a>                                                                                                                                                    |
| <b>10 Singapore</b> | Map                      | OpenStreetMap<br>Google Map<br>TomTom City<br>World Map | <a href="http://www.openstreetmap.org.nz/">http://www.openstreetmap.org.nz/</a><br><a href="https://www.tomtom.com/en_gb/traffic-news/">maps.google.com</a><br><a href="https://www.tomtom.com/en_gb/traffic-news/">https://www.tomtom.com/en_gb/traffic-news/</a><br><a href="http://www.arcgis.com/home/item.html?id=94f838a535334cf1aa061846514b77c7">http://www.arcgis.com/home/item.html?id=94f838a535334cf1aa061846514b77c7</a>                                                                                     |
|                     | Main road speed          | 25 km/hr                                                | <a href="https://www.tomtom.com/en_gb/trafficindex/city/singapore">https://www.tomtom.com/en_gb/trafficindex/city/singapore</a><br><a href="https://www.singstat.gov.sg/statistics/latest-data#9">https://www.singstat.gov.sg/statistics/latest-data#9</a><br><a href="https://www.tomtom.com/en_gb/trafficindex/city/singapore">https://www.tomtom.com/en_gb/trafficindex/city/singapore</a>                                                                                                                             |
|                     | Minor road speed         | 27 km/hr                                                |                                                                                                                                                                                                                                                                                                                                                                                                                                                                                                                           |
|                     | General speed            | 25 km/hr                                                | <a href="https://www.lta.gov.sg/content/ltaweb/en/roads-and-motoring.html">https://www.lta.gov.sg/content/ltaweb/en/roads-and-motoring.html</a>                                                                                                                                                                                                                                                                                                                                                                           |
|                     | Restraining & congestion |                                                         |                                                                                                                                                                                                                                                                                                                                                                                                                                                                                                                           |
|                     | All PT timetables        |                                                         | <a href="https://www.sbstransit.com.sg/transport/trpt_bus_timetable.aspx">https://www.sbstransit.com.sg/transport/trpt_bus_timetable.aspx</a><br><a href="https://www.mytransport.sg/content/mytransport/home/dataMall.html">https://www.mytransport.sg/content/mytransport/home/dataMall.html</a><br><a href="https://www.lta.gov.sg/content/ltaweb/en/public-transport/mrt-and-lrt-trains/train-system-map.html">https://www.lta.gov.sg/content/ltaweb/en/public-transport/mrt-and-lrt-trains/train-system-map.html</a> |
| <b>11 Bangkok</b>   | Map                      | OpenStreetMap<br>Google map<br>TomTom City<br>World Map | <a href="http://www.openstreetmap.org.nz/">http://www.openstreetmap.org.nz/</a><br><a href="https://www.tomtom.com/en_gb/traffic-news/">maps.google.com</a><br><a href="https://www.tomtom.com/en_gb/traffic-news/">https://www.tomtom.com/en_gb/traffic-news/</a><br><a href="http://www.arcgis.com/home/item.html?id=94f838a535334cf1aa061846514b77c7">http://www.arcgis.com/home/item.html?id=94f838a535334cf1aa061846514b77c7</a>                                                                                     |
|                     | Main road speed          | 24 km/hr                                                | <a href="https://www.ontario.ca/data/2011-average-car-travel-speed">https://www.ontario.ca/data/2011-average-car-travel-speed</a>                                                                                                                                                                                                                                                                                                                                                                                         |
|                     | Minor road speed         | 26 km/hr                                                |                                                                                                                                                                                                                                                                                                                                                                                                                                                                                                                           |
|                     | General speed            | 27 km/hr                                                | <a href="https://coconuts.co/jakarta/news/average-driving-speed-jakarta-weekday-mornings-5-kmh/">https://coconuts.co/jakarta/news/average-driving-speed-jakarta-weekday-mornings-5-kmh/</a>                                                                                                                                                                                                                                                                                                                               |

|                  |                          |                                                |                                                                                                                                                                                                                                                                                                                                                                                                                                                                                                                                                 |
|------------------|--------------------------|------------------------------------------------|-------------------------------------------------------------------------------------------------------------------------------------------------------------------------------------------------------------------------------------------------------------------------------------------------------------------------------------------------------------------------------------------------------------------------------------------------------------------------------------------------------------------------------------------------|
|                  | Restraining & congestion |                                                | <a href="http://inrix.com/scorecard-city/?city=Bangkok&amp;index=16">http://inrix.com/scorecard-city/?city=Bangkok&amp;index=16</a><br><a href="http://www.straitstimes.com/asia/se-asia/thailand-has-worlds-most-congested-roads-survey">http://www.straitstimes.com/asia/se-asia/thailand-has-worlds-most-congested-roads-survey</a>                                                                                                                                                                                                          |
|                  | All PT timetables        |                                                | <a href="http://unhabitat.org/wp-content/uploads/2013/06/GRHS.2013.Case_Study_Bangkok.Thailand.pdf">http://unhabitat.org/wp-content/uploads/2013/06/GRHS.2013.Case_Study_Bangkok.Thailand.pdf</a>                                                                                                                                                                                                                                                                                                                                               |
| <b>12 London</b> | Other                    |                                                |                                                                                                                                                                                                                                                                                                                                                                                                                                                                                                                                                 |
|                  | Map                      | OpenStreetMap<br>Google Map<br>Government data | <a href="http://www.openstreetmap.org.nz/">http://www.openstreetmap.org.nz/</a><br><a href="https://www.google.com/maps">maps.google.com</a><br><a href="https://tfl.gov.uk/">https://tfl.gov.uk/</a><br><a href="https://data.gov.uk/dataset/gb-road-traffic-counts">https://data.gov.uk/dataset/gb-road-traffic-counts</a><br><a href="https://data.gov.uk/dataset/gb-road-traffic-counts/resource/e85266b0-4c7b-4f5b-b2db-22c57f9b952c">https://data.gov.uk/dataset/gb-road-traffic-counts/resource/e85266b0-4c7b-4f5b-b2db-22c57f9b952c</a> |
|                  |                          | World Map                                      | <a href="http://www.arcgis.com/home/item.html?id=94f838a535334cf1aa061846514b77c7">http://www.arcgis.com/home/item.html?id=94f838a535334cf1aa061846514b77c7</a>                                                                                                                                                                                                                                                                                                                                                                                 |
|                  | Main road speed          | 31 km/hr                                       | <a href="http://www.dft.gov.uk/traffic-counts/download.php">http://www.dft.gov.uk/traffic-counts/download.php</a>                                                                                                                                                                                                                                                                                                                                                                                                                               |
|                  | Minor road speed         | 15 km/hr                                       | <a href="http://www.dft.gov.uk/traffic-counts/download.php">http://www.dft.gov.uk/traffic-counts/download.php</a>                                                                                                                                                                                                                                                                                                                                                                                                                               |
|                  | General speed            | 32 km/hr                                       | <a href="https://data.gov.uk/dataset/gb-road-traffic-counts">https://data.gov.uk/dataset/gb-road-traffic-counts</a><br><a href="https://www.gov.uk/government/collections/road-traffic-statistics#publications-2017">https://www.gov.uk/government/collections/road-traffic-statistics#publications-2017</a><br><a href="https://londontransportdata.wordpress.com/2012/06/25/traffic-speeds-and-congestion-by-region/">https://londontransportdata.wordpress.com/2012/06/25/traffic-speeds-and-congestion-by-region/</a>                       |
|                  | Restraining & congestion |                                                | <a href="https://data.london.gov.uk/dataset/traffic-flows-borough">https://data.london.gov.uk/dataset/traffic-flows-borough</a><br><a href="https://data.london.gov.uk/dataset/cycle-flows-tfl-road-network">https://data.london.gov.uk/dataset/cycle-flows-tfl-road-network</a>                                                                                                                                                                                                                                                                |
|                  | PT travel data           |                                                | <a href="https://tfl.gov.uk/info-for/open-data-users/our-open-data#on-this-page-3">https://tfl.gov.uk/info-for/open-data-users/our-open-data#on-this-page-3</a><br><a href="https://data.london.gov.uk/dataset/public-transport-journeys-type-transport">https://data.london.gov.uk/dataset/public-transport-journeys-type-transport</a><br><a href="https://data.london.gov.uk/dataset/traffic-flows-borough">https://data.london.gov.uk/dataset/traffic-flows-borough</a>                                                                     |
|                  | Other                    |                                                | <a href="http://content.tfl.gov.uk/Travel-in-London-report-1.pdf">http://content.tfl.gov.uk/Travel-in-London-report-1.pdf</a><br><a href="http://search.abs.gov.au/s/search.html?clicked_fluster=public+transport+use&amp;cluster0=public+transport&amp;form=simple&amp;origin=-">http://search.abs.gov.au/s/search.html?clicked_fluster=public+transport+use&amp;cluster0=public+transport&amp;form=simple&amp;origin=-</a>                                                                                                                    |
|                  | <b>13 Chicago</b>        | Map                                            | OpenStreetMap<br>Google Map<br>TomTom City                                                                                                                                                                                                                                                                                                                                                                                                                                                                                                      |

|                   |                          |               |                                                                                                                                                                                                                                                                                                                                                                                                                                                                                                                                                                                                                                                                                                                                                        |
|-------------------|--------------------------|---------------|--------------------------------------------------------------------------------------------------------------------------------------------------------------------------------------------------------------------------------------------------------------------------------------------------------------------------------------------------------------------------------------------------------------------------------------------------------------------------------------------------------------------------------------------------------------------------------------------------------------------------------------------------------------------------------------------------------------------------------------------------------|
|                   |                          | World Map     | <a href="http://www.arcgis.com/home/item.html?id=94f838a535334cf1aa061846514b77c7">http://www.arcgis.com/home/item.html?id=94f838a535334cf1aa061846514b77c7</a><br><a href="http://gis.dot.illinois.gov/StateMapView/">http://gis.dot.illinois.gov/StateMapView/</a>                                                                                                                                                                                                                                                                                                                                                                                                                                                                                   |
|                   | Main road speed          | 33 km/hr      | <a href="https://www.tomtom.com/en_gb/trafficindex/city/chicago">https://www.tomtom.com/en_gb/trafficindex/city/chicago</a>                                                                                                                                                                                                                                                                                                                                                                                                                                                                                                                                                                                                                            |
|                   | Minor road speed         | 40 km/hr      | <a href="https://www.tomtom.com/en_gb/trafficindex/city/chicago">https://www.tomtom.com/en_gb/trafficindex/city/chicago</a>                                                                                                                                                                                                                                                                                                                                                                                                                                                                                                                                                                                                                            |
|                   | General speed            | 37 km/hr      | <a href="https://www.tomtom.com/en_gb/trafficindex/city/chicago">https://www.tomtom.com/en_gb/trafficindex/city/chicago</a><br><a href="https://www.travelmidwest.com/lmiga/map.jsp?mapname=chicagoArea">https://www.travelmidwest.com/lmiga/map.jsp?mapname=chicagoArea</a><br><a href="http://www.cmap.illinois.gov/data/transportation/traffic/historic-traffic-data">http://www.cmap.illinois.gov/data/transportation/traffic/historic-traffic-data</a><br><a href="http://udforu.com/in-progress/chicago-traffic-congestion-study/">http://udforu.com/in-progress/chicago-traffic-congestion-study/</a>                                                                                                                                           |
|                   | Restraining & congestion |               | <a href="https://data.cityofchicago.org/Transportation/Average-Daily-Traffic-Counts-Map/pf56-35rv/data">https://data.cityofchicago.org/Transportation/Average-Daily-Traffic-Counts-Map/pf56-35rv/data</a><br><a href="https://catalog.data.gov/dataset?tags=traffic&amp;publisher=data.cityofchicago.org&amp;organization=city-of-chicago">https://catalog.data.gov/dataset?tags=traffic&amp;publisher=data.cityofchicago.org&amp;organization=city-of-chicago</a>                                                                                                                                                                                                                                                                                     |
| <b>14 Toronto</b> | All PT timetables        |               | <a href="https://www.transitchicago.com/schedules/">https://www.transitchicago.com/schedules/</a>                                                                                                                                                                                                                                                                                                                                                                                                                                                                                                                                                                                                                                                      |
|                   | Map                      | OpenStreetMap | <a href="http://www.openstreetmap.org.nz/">http://www.openstreetmap.org.nz/</a>                                                                                                                                                                                                                                                                                                                                                                                                                                                                                                                                                                                                                                                                        |
|                   |                          | Google Map    | <a href="https://maps.google.com">maps.google.com</a>                                                                                                                                                                                                                                                                                                                                                                                                                                                                                                                                                                                                                                                                                                  |
|                   |                          | TomTom City   | <a href="https://www.tomtom.com/en_gb/traffic-news/">https://www.tomtom.com/en_gb/traffic-news/</a>                                                                                                                                                                                                                                                                                                                                                                                                                                                                                                                                                                                                                                                    |
|                   |                          | World Map     | <a href="http://www.arcgis.com/home/item.html?id=94f838a535334cf1aa061846514b77c7">http://www.arcgis.com/home/item.html?id=94f838a535334cf1aa061846514b77c7</a><br><a href="https://www.toronto.ca/wp-content/uploads/2017/11/91f0-city_congestion_trends_09-15-2015.pdf">https://www.toronto.ca/wp-content/uploads/2017/11/91f0-city_congestion_trends_09-15-2015.pdf</a>                                                                                                                                                                                                                                                                                                                                                                             |
|                   | Main road speed          | 35km/hr       | <a href="http://www.civil.uwaterloo.ca/bhellinga/publications/Publications/ITE-1994-Speed-delay.pdf">http://www.civil.uwaterloo.ca/bhellinga/publications/Publications/ITE-1994-Speed-delay.pdf</a><br><a href="https://www.tomtom.com/en_gb/trafficindex/city/toronto">https://www.tomtom.com/en_gb/trafficindex/city/toronto</a>                                                                                                                                                                                                                                                                                                                                                                                                                     |
|                   | Minor road speed         | 40km/hr       | <a href="https://www.tomtom.com/en_gb/trafficindex/city/toronto">https://www.tomtom.com/en_gb/trafficindex/city/toronto</a>                                                                                                                                                                                                                                                                                                                                                                                                                                                                                                                                                                                                                            |
|                   | General speed            | 39km/hr       | <a href="http://www.cbc.ca/news/technology/three-in-4-drivers-travel-above-the-speed-limit-on-canada-s-busiest-highway-1.3280254">http://www.cbc.ca/news/technology/three-in-4-drivers-travel-above-the-speed-limit-on-canada-s-busiest-highway-1.3280254</a>                                                                                                                                                                                                                                                                                                                                                                                                                                                                                          |
|                   | Restraining & congestion |               | <a href="https://www.thestar.com/news/gta/2015/10/09/congestion-in-toronto-still-a-headache-report.html">https://www.thestar.com/news/gta/2015/10/09/congestion-in-toronto-still-a-headache-report.html</a><br><a href="https://torontoist.com/2016/09/the-real-cost-of-congestion-in-toronto/">https://torontoist.com/2016/09/the-real-cost-of-congestion-in-toronto/</a><br><a href="https://www.theglobeandmail.com/news/toronto/constant-gridlock/article18406658/">https://www.theglobeandmail.com/news/toronto/constant-gridlock/article18406658/</a><br><a href="http://www.metrolinx.com/en/regionalplanning/costsofcongestion/costs_congestion.aspx">http://www.metrolinx.com/en/regionalplanning/costsofcongestion/costs_congestion.aspx</a> |
|                   | All PT timetables        |               | <a href="https://ttc.ca/Routes/index.jsp">https://ttc.ca/Routes/index.jsp</a>                                                                                                                                                                                                                                                                                                                                                                                                                                                                                                                                                                                                                                                                          |

|                    |                      |                                                                                                                                                                                                                                                                                                   |                                                                                                                                                                                                                                                                                                                                                                                                                                                                                                                                                                                                                                                                                                                                                                                                                            |                                                                                                                                                                                                                                                                                               |
|--------------------|----------------------|---------------------------------------------------------------------------------------------------------------------------------------------------------------------------------------------------------------------------------------------------------------------------------------------------|----------------------------------------------------------------------------------------------------------------------------------------------------------------------------------------------------------------------------------------------------------------------------------------------------------------------------------------------------------------------------------------------------------------------------------------------------------------------------------------------------------------------------------------------------------------------------------------------------------------------------------------------------------------------------------------------------------------------------------------------------------------------------------------------------------------------------|-----------------------------------------------------------------------------------------------------------------------------------------------------------------------------------------------------------------------------------------------------------------------------------------------|
| <b>15 Sydney</b>   | Map                  | OpenStreetMap                                                                                                                                                                                                                                                                                     | <a href="http://www.openstreetmap.org.nz/">http://www.openstreetmap.org.nz/</a>                                                                                                                                                                                                                                                                                                                                                                                                                                                                                                                                                                                                                                                                                                                                            |                                                                                                                                                                                                                                                                                               |
|                    |                      | Google Map                                                                                                                                                                                                                                                                                        | <a href="https://maps.google.com">maps.google.com</a>                                                                                                                                                                                                                                                                                                                                                                                                                                                                                                                                                                                                                                                                                                                                                                      |                                                                                                                                                                                                                                                                                               |
|                    |                      | PT stations                                                                                                                                                                                                                                                                                       | <a href="http://www.rms.nsw.gov.au/about/corporate-publications/statistics/traffic-volumes/aadt-map/index.html#/?z=7&amp;lat=-33.78977232045953&amp;lon=151.3446739999999&amp;st=2">http://www.rms.nsw.gov.au/about/corporate-publications/statistics/traffic-volumes/aadt-map/index.html#/?z=7&amp;lat=-33.78977232045953&amp;lon=151.3446739999999&amp;st=2</a>                                                                                                                                                                                                                                                                                                                                                                                                                                                          |                                                                                                                                                                                                                                                                                               |
|                    | Average travel speed | 31 km/hr                                                                                                                                                                                                                                                                                          | <a href="http://roadsreport.rms.nsw.gov.au/#/chart?location=NSW&amp;dateStart=2017-09-01&amp;dateEnd=2017-11-30&amp;peak=AM&amp;type=period-plot">http://roadsreport.rms.nsw.gov.au/#/chart?location=NSW&amp;dateStart=2017-09-01&amp;dateEnd=2017-11-30&amp;peak=AM&amp;type=period-plot</a>                                                                                                                                                                                                                                                                                                                                                                                                                                                                                                                              |                                                                                                                                                                                                                                                                                               |
|                    |                      | Average Highway speed                                                                                                                                                                                                                                                                             | 40.5 km/hr                                                                                                                                                                                                                                                                                                                                                                                                                                                                                                                                                                                                                                                                                                                                                                                                                 | <a href="http://roadsreport.rms.nsw.gov.au/#/chart?location=NSW&amp;dateStart=2017-12-01&amp;dateEnd=2018-02-28&amp;peak=AM&amp;type=period-plot">http://roadsreport.rms.nsw.gov.au/#/chart?location=NSW&amp;dateStart=2017-12-01&amp;dateEnd=2018-02-28&amp;peak=AM&amp;type=period-plot</a> |
|                    |                      | PT travel data                                                                                                                                                                                                                                                                                    | <a href="https://data.nsw.gov.au/data/dataset/train-data">https://data.nsw.gov.au/data/dataset/train-data</a><br><a href="https://www.transport.nsw.gov.au/">https://www.transport.nsw.gov.au/</a><br><a href="https://www.transport.nsw.gov.au/data-and-research">https://www.transport.nsw.gov.au/data-and-research</a><br><a href="http://search.abs.gov.au/s/search.html?clicked_fluster=public+transport+use&amp;cluster0=public+transport&amp;form=simple&amp;origin=-9.483307%2C176.91669&amp;profile=_default&amp;query=%60Public+transport+use%60&amp;collection=abs">http://search.abs.gov.au/s/search.html?clicked_fluster=public+transport+use&amp;cluster0=public+transport&amp;form=simple&amp;origin=-9.483307%2C176.91669&amp;profile=_default&amp;query=%60Public+transport+use%60&amp;collection=abs</a> |                                                                                                                                                                                                                                                                                               |
| <b>16 Auckland</b> | Other                |                                                                                                                                                                                                                                                                                                   |                                                                                                                                                                                                                                                                                                                                                                                                                                                                                                                                                                                                                                                                                                                                                                                                                            |                                                                                                                                                                                                                                                                                               |
| Map                | OpenStreetMap        | <a href="http://www.openstreetmap.org.nz/">http://www.openstreetmap.org.nz/</a>                                                                                                                                                                                                                   | <a href="https://wiki.openstreetmap.org/wiki/WikiProject_New_Zealand#OSM_Auckland_meetings">https://wiki.openstreetmap.org/wiki/WikiProject_New_Zealand#OSM_Auckland_meetings</a>                                                                                                                                                                                                                                                                                                                                                                                                                                                                                                                                                                                                                                          |                                                                                                                                                                                                                                                                                               |
|                    | Road maps/levels     |                                                                                                                                                                                                                                                                                                   |                                                                                                                                                                                                                                                                                                                                                                                                                                                                                                                                                                                                                                                                                                                                                                                                                            |                                                                                                                                                                                                                                                                                               |
|                    | Google Map           |                                                                                                                                                                                                                                                                                                   | <a href="https://www.google.co.nz/maps?source=tldsi&amp;hl=zh-CN">https://www.google.co.nz/maps?source=tldsi&amp;hl=zh-CN</a>                                                                                                                                                                                                                                                                                                                                                                                                                                                                                                                                                                                                                                                                                              |                                                                                                                                                                                                                                                                                               |
|                    | Changes & revise     |                                                                                                                                                                                                                                                                                                   | Use Map-editor to change data from internet; to suit the requirements.                                                                                                                                                                                                                                                                                                                                                                                                                                                                                                                                                                                                                                                                                                                                                     |                                                                                                                                                                                                                                                                                               |
|                    | World Map            |                                                                                                                                                                                                                                                                                                   | <a href="http://www.arcgis.com/home/item.html?id=94f838a535334cf1aa061846514b77c7">http://www.arcgis.com/home/item.html?id=94f838a535334cf1aa061846514b77c7</a>                                                                                                                                                                                                                                                                                                                                                                                                                                                                                                                                                                                                                                                            |                                                                                                                                                                                                                                                                                               |
|                    | Main road speed      | 42 km/hr                                                                                                                                                                                                                                                                                          | <a href="https://at.govt.nz/media/970611/Penlink-Traffic-and-Economic-Analysis.pdf">https://at.govt.nz/media/970611/Penlink-Traffic-and-Economic-Analysis.pdf</a>                                                                                                                                                                                                                                                                                                                                                                                                                                                                                                                                                                                                                                                          |                                                                                                                                                                                                                                                                                               |
| Minor road speed   | 30 km/hr             |                                                                                                                                                                                                                                                                                                   |                                                                                                                                                                                                                                                                                                                                                                                                                                                                                                                                                                                                                                                                                                                                                                                                                            |                                                                                                                                                                                                                                                                                               |
| General speed      | Speed limits         | Restrictions are not assigned to some road layers.<br><a href="https://at.govt.nz/media/1973943/schedule-of-speed-limits-27-june-2012.pdf">https://at.govt.nz/media/1973943/schedule-of-speed-limits-27-june-2012.pdf</a><br>Graphs of state highway MADT percentage changes (all vehicles) 2013. |                                                                                                                                                                                                                                                                                                                                                                                                                                                                                                                                                                                                                                                                                                                                                                                                                            |                                                                                                                                                                                                                                                                                               |

|                      |                          |                  |  |                                                                                                                                                                                                                                                                                                                                                                                                                                                                                                                                                                                                                                                                                                                                                                                                                                                                                                                                                                                                                                                                                                                                                                                                                                                                                                                                                                                                                                                                                                  |
|----------------------|--------------------------|------------------|--|--------------------------------------------------------------------------------------------------------------------------------------------------------------------------------------------------------------------------------------------------------------------------------------------------------------------------------------------------------------------------------------------------------------------------------------------------------------------------------------------------------------------------------------------------------------------------------------------------------------------------------------------------------------------------------------------------------------------------------------------------------------------------------------------------------------------------------------------------------------------------------------------------------------------------------------------------------------------------------------------------------------------------------------------------------------------------------------------------------------------------------------------------------------------------------------------------------------------------------------------------------------------------------------------------------------------------------------------------------------------------------------------------------------------------------------------------------------------------------------------------|
|                      |                          |                  |  | <a href="https://www.nzta.govt.nz/assets/resources/state-highway-traffic-volumes/docs/2013-2017-national-telemetry-site-profiles.pdf">https://www.nzta.govt.nz/assets/resources/state-highway-traffic-volumes/docs/2013-2017-national-telemetry-site-profiles.pdf</a><br><a href="http://www.transport.govt.nz/research/roadsafety-surveys/speedsurveys/2013speedsurveys/results/carspeeds/">http://www.transport.govt.nz/research/roadsafety-surveys/speedsurveys/2013speedsurveys/results/carspeeds/</a>                                                                                                                                                                                                                                                                                                                                                                                                                                                                                                                                                                                                                                                                                                                                                                                                                                                                                                                                                                                       |
|                      | Restraining & congestion |                  |  | <a href="https://www.nzta.govt.nz/assets/resources/state-highway-traffic-volumes/docs/2013-2017-national-telemetry-site-profiles.pdf">https://www.nzta.govt.nz/assets/resources/state-highway-traffic-volumes/docs/2013-2017-national-telemetry-site-profiles.pdf</a><br><a href="http://www.transport.govt.nz/ourwork/tmif/transport-volume/">http://www.transport.govt.nz/ourwork/tmif/transport-volume/</a><br><a href="https://www.greatauckland.org.nz/our-analysis/transport-statistics/traffic-volumes/">https://www.greatauckland.org.nz/our-analysis/transport-statistics/traffic-volumes/</a><br><a href="https://at.govt.nz/bus-train-ferry/timetables/#Central">https://at.govt.nz/bus-train-ferry/timetables/#Central</a><br><a href="http://transportblog.co.nz/tag/patronage/">http://transportblog.co.nz/tag/patronage/</a><br><a href="http://www.openstreetmap.org.nz/">http://www.openstreetmap.org.nz/</a><br><a href="https://www.openstreetmap.org/node/13707878#map=11/55.6414/12.5910&amp;layers=TOND">https://www.openstreetmap.org/node/13707878#map=11/55.6414/12.5910&amp;layers=TOND</a><br><a href="https://www.google.com/maps/place/Copenhagen,+Denmark/@55.6802826,12.5254926,12.25z/data=!4m5!3m4!1s0x4652533c5c803d23:0x4dd7edde69467b818m2!3d55.6760968!4d12.5683372?hl=en">https://www.google.com/maps/place/Copenhagen,+Denmark/@55.6802826,12.5254926,12.25z/data=!4m5!3m4!1s0x4652533c5c803d23:0x4dd7edde69467b818m2!3d55.6760968!4d12.5683372?hl=en</a> |
|                      | All PT timetables        |                  |  |                                                                                                                                                                                                                                                                                                                                                                                                                                                                                                                                                                                                                                                                                                                                                                                                                                                                                                                                                                                                                                                                                                                                                                                                                                                                                                                                                                                                                                                                                                  |
|                      | Other                    |                  |  |                                                                                                                                                                                                                                                                                                                                                                                                                                                                                                                                                                                                                                                                                                                                                                                                                                                                                                                                                                                                                                                                                                                                                                                                                                                                                                                                                                                                                                                                                                  |
| <b>17 Copenhagen</b> | Map                      | OpenStreetMap    |  |                                                                                                                                                                                                                                                                                                                                                                                                                                                                                                                                                                                                                                                                                                                                                                                                                                                                                                                                                                                                                                                                                                                                                                                                                                                                                                                                                                                                                                                                                                  |
|                      |                          | Road maps/levels |  |                                                                                                                                                                                                                                                                                                                                                                                                                                                                                                                                                                                                                                                                                                                                                                                                                                                                                                                                                                                                                                                                                                                                                                                                                                                                                                                                                                                                                                                                                                  |
|                      |                          | Google Map       |  |                                                                                                                                                                                                                                                                                                                                                                                                                                                                                                                                                                                                                                                                                                                                                                                                                                                                                                                                                                                                                                                                                                                                                                                                                                                                                                                                                                                                                                                                                                  |
|                      | Changes & revise         | World Map        |  | Use Map Editor to change data from Internet to suit requirements.<br><a href="http://www.arcgis.com/home/item.html?id=94f838a535334cf1aa061846514b77c7">http://www.arcgis.com/home/item.html?id=94f838a535334cf1aa061846514b77c7</a><br><a href="https://www.tomtom.com/en_gb/trafficindex/city/copenhagen">https://www.tomtom.com/en_gb/trafficindex/city/copenhagen</a>                                                                                                                                                                                                                                                                                                                                                                                                                                                                                                                                                                                                                                                                                                                                                                                                                                                                                                                                                                                                                                                                                                                        |
|                      | Main Road speed          | 35km/hr          |  |                                                                                                                                                                                                                                                                                                                                                                                                                                                                                                                                                                                                                                                                                                                                                                                                                                                                                                                                                                                                                                                                                                                                                                                                                                                                                                                                                                                                                                                                                                  |
|                      | Minor Road speed         | 30km/hr          |  |                                                                                                                                                                                                                                                                                                                                                                                                                                                                                                                                                                                                                                                                                                                                                                                                                                                                                                                                                                                                                                                                                                                                                                                                                                                                                                                                                                                                                                                                                                  |
|                      | General speed            | Speed limits     |  | <a href="https://books.google.co.nz/books?id=SBCmiaRdoGEC&amp;pg=PT28&amp;dq=copenhagen+traffic+congestion&amp;hl=en&amp;sa=X&amp;ved=0ahUKEwj57syB4pXiAhUw6XMBHZlwAKEQ6AEINjAC#v=onepage&amp;q=copenhagen%20traffic%20congestion&amp;f=false">https://books.google.co.nz/books?id=SBCmiaRdoGEC&amp;pg=PT28&amp;dq=copenhagen+traffic+congestion&amp;hl=en&amp;sa=X&amp;ved=0ahUKEwj57syB4pXiAhUw6XMBHZlwAKEQ6AEINjAC#v=onepage&amp;q=copenhagen%20traffic%20congestion&amp;f=false</a><br><a href="https://books.google.co.nz/books?id=ZY7qISU8ZdIC&amp;pg=PA87&amp;dq=copenhagen+traffic+congestion&amp;hl=en&amp;sa=X&amp;ved=0ahUKEwj57syB4pXiAhUw6XMBHZlwAKEQ6AEPDAD#v=onepage&amp;q=copenhagen%20traffic%20congestion&amp;f=false">https://books.google.co.nz/books?id=ZY7qISU8ZdIC&amp;pg=PA87&amp;dq=copenhagen+traffic+congestion&amp;hl=en&amp;sa=X&amp;ved=0ahUKEwj57syB4pXiAhUw6XMBHZlwAKEQ6AEPDAD#v=onepage&amp;q=copenhagen%20traffic%20congestion&amp;f=false</a>                                                                                                                                                                                                                                                                                                                                                                                                                                                                                                                 |
|                      | All PT timetables        |                  |  | <a href="https://en.wikipedia.org/wiki/Transport_in_Copenhagen">https://en.wikipedia.org/wiki/Transport_in_Copenhagen</a><br><a href="https://stateofgreen.com/en/publications/sustainable-urban-transportation/">https://stateofgreen.com/en/publications/sustainable-urban-transportation/</a><br><a href="http://www.trafikdage.dk/td/papers/papers06/Trafikdage-2006-556.pdf">http://www.trafikdage.dk/td/papers/papers06/Trafikdage-2006-556.pdf</a>                                                                                                                                                                                                                                                                                                                                                                                                                                                                                                                                                                                                                                                                                                                                                                                                                                                                                                                                                                                                                                        |
